# Supplementary material
Source: publisher figshare collection journal article supplement (https://brill.figshare.com/articles/dataset/_/26236307)
Supplement: Supplementary file 1 [file 1]

## Sheet: Data 2023
Table S6. Detailed field sampling data of our snapshot mosquito field study in Central Europe, 2023.
Country	Province AdminNUTS2	AdminNUTS3	Location ID	Sample ID	Location name	Sampling address	Latitude Y	Longitude X	User	Startdate	Enddate	Comment	Trap_type	Positive sample	Adult habitat	Land use	LH category	H description	Density total	Density %	Stages	no. eggs	no. larvae	no. pupae	no. males	no. females	Species	Identification method
Czech Republic	Severozápad	Karlovarský kraj	CZ001	CZ001	Drahovice	Cemetery Karlovy Vary-Drahovice	50.2312	12.8904	Francis Schaffner	2023-06-19 12:05:00	2023-06-19 12:15:00		Larval sampling	0		Suburban habitat	Human-made (artificial) container	5 vases
Czech Republic	Severozápad	Ústecký kraj	CZ002	CZ/23/01	Telnice	Ski areal Telnice, r.2484	50.7365	13.9284	Francis Schaffner	2023-06-19 13:50:00	2023-06-19 14:00:00		Larval sampling	1		Forest and shrub	Natural container	2 tree holes Fagus sylvatica	20 l/l	100	L2-3		10				Aedes geniculatus	Morphological
Czech Republic	Severozápad	Ústecký kraj	CZ003	CZ/23/02	Chlumec	Cemetery, r.13	50.7029	13.9469	Francis Schaffner	2023-06-19 14:35:00	2023-06-19 14:45:00		Larval sampling	1		Suburban habitat	Human-made (artificial) container	1 plastic bucket	30 l/l	100	L3-4		20				Aedes japonicus	Morphological
Czech Republic	Severozápad	Ústecký kraj	CZ004	CZ004	Sluknov	Karlova, Cemetery	51.001	14.4556	Francis Schaffner	2023-06-19 19:00:00	2023-06-19 19:10:00		Larval sampling	0		Suburban habitat	Human-made (artificial) container	7 plastic vases , 2 stone foutains
Czech Republic	Moravskoslezsko	Moravskoslezský kraj	CZ005	CZ/23/03	Cesky Tesin	Zukovska, Cemetery	49.7307	18.6029	Francis Schaffner	2023-06-25 15:10:00	2023-06-25 15:25:00	1 Aedes-positive vase	Larval sampling	1		Suburban habitat	Human-made (artificial) container	14 plastic vases	80l/l	100	L2-3		16				Aedes japonicus	Morphological
Germany	Oberfranken	Wunsiedel i. Fichtelgebirge	DE001	DE/23/01	Röslau	Wunsiedlerstrasse 22	50.0814	11.9762	Francis Schaffner	2023-06-18 16:50:00	2023-06-18 16:55:00		Larval sampling	1		Urban habitat	Human-made (artificial) container	1 black plastic bucket, 1 bassin	5 l/l	70	L2-3-4,P		20	1	1		Culex torrentium	Morphological
Germany	Oberfranken	Wunsiedel i. Fichtelgebirge	DE001	DE/23/01	Röslau	Wunsiedlerstrasse 22	50.0814	11.9762	Francis Schaffner	2023-06-18 16:50:00	2023-06-18 16:55:00		Larval sampling	1		Urban habitat	Human-made (artificial) container	1 black plastic bucket, 1 bassin	5 l/l	30	P			8	3	5	Culiseta annulata	Morphological
Germany	Oberfranken	Wunsiedel i. Fichtelgebirge	DE002	DE002	Hohenberg an der Eger	Selberstrasse, Friedhof	50.0992	12.2186	Francis Schaffner	2023-06-18 18:35:00	2023-06-18 18:40:00		Larval sampling	0		Suburban habitat	Human-made (artificial) container	7 plastic vases and saucers
Germany	Dresden	Sächsische Schweiz-Osterzgebirge	DE005	DE/23/06	Bad Gottleuba-Berggiesshübel	Friedhof Bad Gottleuba	50.8447	13.9447	Francis Schaffner	2023-06-19 15:35:00	2023-06-19 15:45:00	2 positive vases	Larval sampling	1		Suburban habitat	Human-made (artificial) container	10 vases, 1 barrel, 1 fountain		100	E	80					Culex pipiens/torrentium	Morphological
Germany	Dresden	Sächsische Schweiz-Osterzgebirge	DE006	DE/23/07	Königstein	Bielatalstrasse	50.913	14.0694	Francis Schaffner	2023-06-19 16:20:00	2023-06-19 16:30:00		Larval sampling	1		Suburban habitat	Human-made (artificial) container	blue tarpaulin on trailer	500 l/l	60	E, L1-4, P		50	14	4	10	Culex pipiens	Morphological		1
Germany	Dresden	Sächsische Schweiz-Osterzgebirge	DE006	DE/23/07	Königstein	Bielatalstrasse	50.913	14.0694	Francis Schaffner	2023-06-19 16:20:00	2023-06-19 16:30:00		Larval sampling	1		Suburban habitat	Human-made (artificial) container	blue tarpaulin on trailer	500 l/l	40	E, L1-4, P		50	6	5	1	Culex torrentium	Morphological
Germany	Dresden	Sächsische Schweiz-Osterzgebirge	DE007	DE/23/08	Königstein	Goethestrasse, Friedhof Königstein	50.9164	14.0706	Francis Schaffner	2023-06-19 17:00:00	2023-06-19 17:10:00	6 positive vases and 1 can	Larval sampling	1		Suburban habitat	Human-made (artificial) container	22 vases, 1 watering can	30 l/l	5	E, L1-2-3-4, P		15				Anopheles plumbeus	Morphological
Germany	Dresden	Sächsische Schweiz-Osterzgebirge	DE007	DE/23/08	Königstein	Goethestrasse, Friedhof Königstein	50.9164	14.0706	Francis Schaffner	2023-06-19 17:00:00	2023-06-19 17:10:00	6 positive vases and 1 can	Larval sampling	1		Suburban habitat	Human-made (artificial) container	22 vases, 1 watering can	30 l/l	95	E, L1-2-3-4, P		50				Culex pipiens/torrentium	Morphological
Germany	Dresden	Sächsische Schweiz-Osterzgebirge	DE008	DE/23/09	Sebnitz	Friedhofstrasse, Friedhof	50.9685	14.2741	Francis Schaffner	2023-06-19 18:10:00	2023-06-19 18:20:00		Larval sampling	1		Suburban habitat	Human-made (artificial) container	12 plastic vases	200 l/l	100	L1-2-3		100				Culex pipiens/torrentium	Morphological
Germany	Dresden	Görlitz	DE009	DE/23/10	Neugersdorf	Friedhof Neugersdorf	50.987	14.6196	Francis Schaffner	2023-06-19 22:15:00	2023-06-19 22:35:00	& positive vase and 2 fountains	Larval sampling	1		Suburban habitat	Human-made (artificial) container	15 vases, 6 fountains	5 l/l	50	L4		4				Aedes geniculatus	Morphological
Germany	Dresden	Görlitz	DE009	DE/23/10	Neugersdorf	Friedhof Neugersdorf	50.987	14.6196	Francis Schaffner	2023-06-19 22:15:00	2023-06-19 22:35:00		Larval sampling	1		Suburban habitat	Human-made (artificial) container	15 vases, 6 fountains	5 l/l	50	L3-4, P		2	2	1	1	Culex torrentium	Morphological
Germany	Dresden	Görlitz	DE011	DE/23/12	Niesky	Friedhof Nieksy	51.2855	14.8264	Francis Schaffner	2023-09-25 07:35:00	2023-09-25 07:55:00	a single positive vase	Larval sampling	1		Suburban habitat	Human-made (artificial) container	10 vases, 6 fontains	100 l/l	100	L3-4		30				Culex pipiens/torrentium	Morphological
Germany	Dresden	Dresden, Kreisfreie Stadt	DE012	DE/23/13	Dresden	Heidefriedhof	51.1061	13.7049	Francis Schaffner	2023-10-06 08:30:00	2023-10-06 08:40:00		Larval sampling	1		Suburban habitat	Natural container	1 tree hole	30 l/l	50	L1		4				Anopheles plumbeus	Morphological
Germany	Dresden	Dresden, Kreisfreie Stadt	DE012	DE/23/13	Dresden	Heidefriedhof	51.1061	13.7049	Francis Schaffner	2023-10-06 08:30:00	2023-10-06 08:40:00		Larval sampling	1		Suburban habitat	Natural container	1 tree hole	30 l/l	50	L1		5		1	2	Aedes geniculatus	Morphological
Germany	Dresden	Dresden, Kreisfreie Stadt	DE012	DE/23/14	Dresden	Friedhof Dresden	51.1061	13.7055	Francis Schaffner	2023-10-06 08:45:00	2023-10-06 08:55:00	10 Culex- and 10 Aedes-positive vases	Larval sampling	1		Suburban habitat	Human-made (artificial) container	30 plastic vases	50 l/l	80	L1-2-3-4, P		60				Culex pipiens/torrentium	Morphological
Germany	Dresden	Dresden, Kreisfreie Stadt	DE012	DE/23/14	Dresden	Friedhof Dresden	51.1061	13.7055	Francis Schaffner	2023-10-06 08:45:00	2023-10-06 08:55:00	10 Culex- and 10 Aedes-positive vases	Larval sampling	1		Suburban habitat	Human-made (artificial) container	30 plastic vases	50 l/l	20	L4, P		12	4	2	10	Aedes japonicus	Morphological
Poland	Dolnośląskie	Jeleniogórski	PL001	PL/23/01	Bogatynia	Kurzanska, Cemetery	50.918	14.9575	Francis Schaffner	2023-06-20 14:00:00	2023-06-20 14:15:00		Larval sampling	1		Suburban habitat	Human-made (artificial) container	1 tyre	50 l/l	100	L1-4		30				Culex pipiens/torrentium	Morphological
Poland	Dolnośląskie	Jeleniogórski	PL001	PL/23/02	Bogatynia	Kurzanska, Cemetery	50.9186	14.9581	Francis Schaffner	2023-06-20 14:20:00	2023-06-20 14:25:00	2 positive vases	Larval sampling	1		Suburban habitat	Human-made (artificial) container	10 plastic vases	10 l/l	40	L4		1				Aedes geniculatus	Morphological
Poland	Dolnośląskie	Jeleniogórski	PL001	PL/23/02	Bogatynia	Kurzanska, Cemetery	50.9186	14.9581	Francis Schaffner	2023-06-20 14:20:00	2023-06-20 14:25:00		Larval sampling	1		Suburban habitat	Human-made (artificial) container	10 plastic vases	10 l/l	60	L4		2				Anopheles plumbeus	Morphological
Poland	Dolnośląskie	Jeleniogórski	PL002	PL/23/03a	Krobica	Orlowice, r. 301	50.9306	15.3506	Francis Schaffner	2023-06-20 15:40:00	2023-06-20 15:50:00		Larval sampling	1		Forest and shrub	Human-made (artificial) container	10 tyres, 2 buckets	50 l/l	40	L2-3-4, P		8	2		2	Culex pipiens	Morphological
Poland	Dolnośląskie	Jeleniogórski	PL002	PL/23/03a	Krobica	Orlowice, r. 301	50.9306	15.3506	Francis Schaffner	2023-06-20 15:40:00	2023-06-20 15:50:00		Larval sampling	1		Forest and shrub	Human-made (artificial) container	10 tyres, 2 buckets	50 l/l	30	L3-4, P		6				Aedes geniculatus	Morphological
Poland	Dolnośląskie	Jeleniogórski	PL002	PL/23/03a	Krobica	Orlowice, r. 301	50.9306	15.3506	Francis Schaffner	2023-06-20 15:40:00	2023-06-20 15:50:00		Larval sampling	1		Forest and shrub	Human-made (artificial) container	10 tyres, 2 buckets	50 l/l	15	L3-4, P		4				Anopheles claviger s.s.	Morphological
Poland	Dolnośląskie	Jeleniogórski	PL002	PL/23/03a	Krobica	Orlowice, r. 301	50.9306	15.3506	Francis Schaffner	2023-06-20 15:40:00	2023-06-20 15:50:00		Larval sampling	1		Forest and shrub	Human-made (artificial) container	10 tyres, 2 buckets	50 l/l	15	L2-3, P		4				Culiseta glaphyroptera	Morphological
Poland	Dolnośląskie	Jeleniogórski	PL002	PL/23/03b	Krobica	Orlowice, r. 301	50.9296	15.3516	Francis Schaffner	2023-06-20 15:40:00	2023-06-20 15:50:00		Human landing	1	Forest	Forest and shrub		garbage dum			F					1	Anopheles plumbeus	Morphological
Poland	Dolnośląskie	Jeleniogórski	PL003	PL/23/04	Milków	Cemetery	50.8092	15.7635	Francis Schaffner	2023-06-20 17:50:00	2023-06-20 18:10:00		Larval sampling	1		Suburban habitat	Human-made (artificial) container	12 tyres, 6 vases, 3 buckets	5 l/l	100	L2-3-4		100				Culex pipiens/torrentium	Morphological
Poland	Dolnośląskie	Wałbrzyski	PL004	PL/23/05	Szczawno-Zdrój	Parc Szwedzki	50.8043	16.249	Francis Schaffner	2023-06-21 09:20:00	2023-06-21 09:30:00		Larval sampling	1		Suburban habitat	Natural container	2 tree holes Fagus sylvatica and Aesculus hippocastanum	1 l/l	50	L1-2		5				Anopheles plumbeus	Morphological
Poland	Dolnośląskie	Wałbrzyski	PL004	PL/23/05	Szczawno-Zdrój	Parc Szwedzki	50.8043	16.249	Francis Schaffner	2023-06-21 09:20:00	2023-06-21 09:30:00		Larval sampling	1		Suburban habitat	Natural container	2 tree holes Fagus sylvatica and Aesculus hippocastanum	1 l/l	50	L3-4, P		2	1	1		Aedes geniculatus	Morphological
Poland	Dolnośląskie	Wałbrzyski	PL005	PL/23/06	Wałbrzych	Kazimierza Pulaskiego, Cemetery	50.7844	16.291	Francis Schaffner	2023-06-21 10:00:00	2023-06-21 10:15:00	10 japonicus-, 1 geniculatus-, 14 Culex-positive	Larval sampling	1		Suburban habitat	Human-made (artificial) container	20 vases and buckets	50 l/l	15	L2-4		7				Aedes geniculatus	Morphological
Poland	Dolnośląskie	Wałbrzyski	PL005	PL/23/06	Wałbrzych	Kazimierza Pulaskiego, Cemetery	50.7844	16.291	Francis Schaffner	2023-06-21 10:00:00	2023-06-21 10:15:00	10 japonicus-, 1 geniculatus-, 14 Culex-positive	Larval sampling	1		Suburban habitat	Human-made (artificial) container	20 vases and buckets	50 l/l	85	L1-2-3-4		35				Aedes japonicus	Morphological
Poland	Dolnośląskie	Wałbrzyski	PL006	PL006	Bardo	Glowna, Cemetery	50.5074	16.7444	Francis Schaffner	2023-06-21 14:30:00	2023-06-21 14:40:00		Larval sampling	0		Suburban habitat	Human-made (artificial) container	10 vases and 3 buckets
Poland	Dolnośląskie	Wałbrzyski	PL007	PL/23/07	Pilce		50.5067	16.8278	Francis Schaffner	2023-06-21 15:00:00	2023-06-21 15:10:00		Larval sampling	1		Forest and shrub	Stagnant temporary water body	ditch	3 l/l	100	L1-2-3-4, P		10	1			Anopheles claviger s.s.	Morphological & molecular
Poland	Opolskie	Nyski	PL008	PL/23/08	Nysa	Ekom, Cemetery	50.4809	17.3189	Francis Schaffner	2023-06-21 16:30:00	2023-06-21 16:45:00	3 Aedes-, 1 Anopheles-, 6 Culex-positive	Larval sampling	1		Suburban habitat	Human-made (artificial) container	5 vases, 8 buckets, 1 fountain	50 l/l	30	E, L3-4, P		10	1	1		Culex pipiens	Morphological
Poland	Opolskie	Nyski	PL008	PL/23/08	Nysa	Ekom, Cemetery	50.4809	17.3189	Francis Schaffner	2023-06-21 16:30:00	2023-06-21 16:45:00	3 Aedes-, 1 Anopheles-, 6 Culex-positive	Larval sampling	1		Suburban habitat	Human-made (artificial) container	5 vases, 8 buckets, 1 fountain	50 l/l	15	E, L3-4, P		5	3	2	1	Culex torrentium	Morphological
Poland	Opolskie	Nyski	PL008	PL/23/08	Nysa	Ekom, Cemetery	50.4809	17.3189	Francis Schaffner	2023-06-21 16:30:00	2023-06-21 16:45:00	3 Aedes-, 1 Anopheles-, 6 Culex-positive	Larval sampling	1		Suburban habitat	Human-made (artificial) container	5 vases, 8 buckets, 1 fountain	50 l/l	15	L4, P		1	5	3	2	Aedes geniculatus	Morphological
Poland	Opolskie	Nyski	PL008	PL/23/08	Nysa	Ekom, Cemetery	50.4809	17.3189	Francis Schaffner	2023-06-21 16:30:00	2023-06-21 16:45:00	3 Aedes-, 1 Anopheles-, 6 Culex-positive	Larval sampling	1		Suburban habitat	Human-made (artificial) container	5 vases, 8 buckets, 1 fountain	50 l/l	30	L4, P		8	3	2	1	Aedes japonicus	Morphological
Poland	Opolskie	Nyski	PL008	PL/23/08	Nysa	Ekom, Cemetery	50.4809	17.3189	Francis Schaffner	2023-06-21 16:30:00	2023-06-21 16:45:00	3 Aedes-, 1 Anopheles-, 6 Culex-positive	Larval sampling	1		Suburban habitat	Human-made (artificial) container	5 vases, 8 buckets, 1 fountain	50 l/l	10	L4		2				Anopheles plumbeus	Morphological
Poland	Opolskie	Opolski	PL009	PL/23/09	Pociekarb	Glowna	50.3191	18.0766	Francis Schaffner	2023-06-21 19:05:00	2023-06-21 19:20:00		Human landing	1	Grassland	Agriculture		path between forest and cropland			F					13	Aedes sticticus	Morphological
Poland	Opolskie	Opolski	PL010	PL/23/10a	Pociekarb	Glowna	50.3189	18.0778	Francis Schaffner	2023-06-21 19:20:00	2023-06-21 19:35:00		Larval sampling	1		Agriculture	Human-made (artificial) container	20 tyres	20 l/l	85	L1-2-3-4, P		30	4	4		Culex pipiens	Morphological
Poland	Opolskie	Opolski	PL010	PL/23/10a	Pociekarb	Glowna	50.3189	18.0778	Francis Schaffner	2023-06-21 19:20:00	2023-06-21 19:35:00		Larval sampling	1		Agriculture	Human-made (artificial) container	20 tyres	20 l/l	10	L3-5		5				Aedes japonicus	Morphological
Poland	Opolskie	Opolski	PL010	PL/23/10a	Pociekarb	Glowna	50.3189	18.0778	Francis Schaffner	2023-06-21 19:20:00	2023-06-21 19:35:00		Larval sampling	1		Agriculture	Human-made (artificial) container	20 tyres	20 l/l	3	L2		1				Culiseta annulata	Morphological
Poland	Opolskie	Opolski	PL010	PL/23/10a	Pociekarb	Glowna	50.3189	18.0778	Francis Schaffner	2023-06-21 19:20:00	2023-06-21 19:35:00		Larval sampling	1		Agriculture	Human-made (artificial) container	20 tyres	20 l/l	2	P			1	1		Aedes geniculatus	Morphological
Poland	Opolskie	Opolski	PL010	PL/23/10b	Pociekarb	Glowna	50.3189	18.0778	Francis Schaffner	2023-06-21 19:20:00	2023-06-21 19:35:00		Resting catch	1	Grassland	Agriculture		20 tyres			F, M				1	5	Culex pipiens	Morphological
Poland	Śląskie	Rybnicki	PL011	PL/23/11	Racibórz	Obora, Arboretum	50.0987	18.2643	Francis Schaffner	2023-06-22 10:30:00	2023-06-22 10:45:00		Larval sampling	1		Forest and shrub	Stagnant temporary water body	ditch	< 1 l/l	100	L3-4, P		2	2	2		Anopheles claviger s.s.	Morphological
Poland	Śląskie	Rybnicki	PL011	PL/23/12	Racibórz	Obora, Arboretum	50.0977	18.265	Francis Schaffner	2023-06-22 10:55:00	2023-06-22 11:10:00		Larval sampling	1		Forest and shrub	Natural container	2 tree holes Carpinus betulus	25 l/l	100	L2-3-4		6				Aedes geniculatus	Morphological
Poland	Śląskie	Rybnicki	PL011	PL/23/13	Racibórz	Obora, Arboretum	50.1003	18.2683	Francis Schaffner	2023-06-22 11:20:00	2023-06-22 11:35:00		Human landing	1	Forest	Forest and shrub					F					1	Aedes annulipes/cantans	Morphological
Poland	Śląskie	Rybnicki	PL012	PL012	Pstrazna	Wyzwolenia, Cemetery	50.0882	18.358	Francis Schaffner	2023-06-22 13:15:00	2023-06-22 13:25:00		Larval sampling	0		Forest and shrub	Human-made (artificial) container	4 vases with plastic flowers, 1 bucket
Poland	Śląskie	Rybnicki	PL013	PL/23/14	Rybnik	Cmentarna, Cemetary	50.1041	18.5407	Francis Schaffner	2023-06-22 14:20:00	2023-06-22 14:30:00		Larval sampling	1		Suburban habitat	Human-made (artificial) container	8 vases, 2 buckets	50 l/l	98	E, L1-2-3-4, P		30				Culex pipiens/torrentium	Morphological
Poland	Śląskie	Rybnicki	PL013	PL/23/14	Rybnik	Cmentarna, Cemetary	50.1041	18.5407	Francis Schaffner	2023-06-22 14:20:00	2023-06-22 14:30:00		Larval sampling	1		Suburban habitat	Human-made (artificial) container	8 vases, 2 buckets	50 l/l	2	L2-4		5				Aedes japonicus	Morphological
Poland	Śląskie	Gliwicki	PL014	PL/23/15	Gliwice	Pszcynska - Panewnicka	50.2799	18.6907	Francis Schaffner	2023-06-22 16:40:00	2023-06-22 16:45:00		Larval sampling	1		Suburban habitat	Human-made (artificial) container	1 plastic bucket	5 l/l	100	L3		1				Aedes japonicus	Morphological
Poland	Śląskie	Bytomski	PL015	PL/23/16	Bytom	Cmentery Mater Dolorosa	50.354	18.9206	Francis Schaffner	2023-06-23 12:20:00	2023-06-23 12:35:00	2 positive vases	Larval sampling	1		Suburban habitat	Human-made (artificial) container	15 vases	50 l/l	100	E, L1-2-3-4		30				Culex pipiens/torrentium	Morphological
Poland	Śląskie	Bytomski	PL016	PL/23/17	Bytom	Tarnogorska	50.3584	18.9039	Francis Schaffner	2023-06-23 13:35:00	2023-06-23 13:50:00		Larval sampling	1		Suburban habitat	Human-made (artificial) container	2 tyres	30 l/l	95	L2		20				Culex pipiens/torrentium	Morphological
Poland	Śląskie	Bytomski	PL016	PL/23/17	Bytom	Tarnogorska	50.3584	18.9039	Francis Schaffner	2023-06-23 13:35:00	2023-06-23 13:50:00		Larval sampling	1		Suburban habitat	Human-made (artificial) container	2 tyres	30 l/l	5	L3		1				Aedes japonicus	Morphological
Poland	Śląskie	Katowicki	PL017	PL/23/18	Katowice	Nova Logota, Panewnicka, Cemetery	50.2253	18.963	Francis Schaffner	2023-06-23 11:10:00	2023-06-23 11:30:00	3 positive vases	Larval sampling	1		Suburban habitat	Human-made (artificial) container	6 vases	20 l/l	5	P			1	1		Anopheles plumbeus	Morphological
Poland	Śląskie	Katowicki	PL017	PL/23/18	Katowice	Nova Logota, Panewnicka, Cemetery	50.2253	18.963	Francis Schaffner	2023-06-23 11:10:00	2023-06-23 11:30:00	3 positive vases	Larval sampling	1		Suburban habitat	Human-made (artificial) container	6 vases	20 l/l	95	L4, P		15	11	8	3	Aedes japonicus	Morphological
Poland	Śląskie	Sosnowiecki	PL018	PL/23/19	Dąbrowa Górnicza	Piaski, Romana Piecucha	50.3461	19.2322	Francis Schaffner	2023-06-23 13:15:00	2023-06-23 13:30:00		Larval sampling	1		Suburban habitat	Human-made (artificial) container	1 large tyre	10 l/l	35	L4		6				Anopheles plumbeus	Morphological
Poland	Śląskie	Sosnowiecki	PL018	PL/23/19	Dąbrowa Górnicza	Piaski, Romana Piecucha	50.3461	19.2322	Francis Schaffner	2023-06-23 13:15:00	2023-06-23 13:30:00		Larval sampling	1		Suburban habitat	Human-made (artificial) container	1 large tyre	10 l/l	65	L2-3		12				Aedes japonicus	Morphological
Poland	Śląskie	Sosnowiecki	PL019	PL/23/20	Dąbrowa Górnicza	Zeglarska	50.3616	19.224	Francis Schaffner	2023-06-23 14:50:00	2023-06-23 15:00:00		Human landing	1	Forest	Forest and shrub					F					1	Aedes sticticus	Morphological
Poland	Śląskie	Sosnowiecki	PL019	PL/23/20	Dąbrowa Górnicza	Zeglarska	50.3616	19.224	Francis Schaffner	2023-06-23 14:50:00	2023-06-23 15:00:00		Human landing	1	Forest	Forest and shrub					F					1	Aedes annulipes/cantans	Morphological
Poland	Śląskie	Sosnowiecki	PL019	PL/23/20	Dąbrowa Górnicza	Zeglarska	50.3616	19.224	Francis Schaffner	2023-06-23 14:50:00	2023-06-23 15:00:00		Human landing	1	Forest	Forest and shrub					F					2	Coquillettidia richiardii	Morphological
Poland	Śląskie	Częstochowski	PL020	PL/23/21	Myszków	Helenowka	50.5964	19.3657	Francis Schaffner	2023-06-23 16:20:00	2023-06-23 16:30:00		Larval sampling	1		Forest and shrub	Stagnant temporary water body	pond	< 1 l/l	100	L2-3		3				Culex pipiens/torrentium	Morphological
Poland	Śląskie	Częstochowski	PL020	PL/23/22	Myszków	Helenowka	50.5964	19.3657	Francis Schaffner	2023-06-23 16:40:00	2023-06-23 16:50:00		Larval sampling	1		Forest and shrub	Human-made (artificial) container	4 tyres	5 l/l	100	L1-2		10				Culex pipiens/torrentium	Morphological
Poland	Śląskie	Częstochowski	PL020	PL/23/23	Myszków	Helenowka	50.5965	19.3657	Francis Schaffner	2023-06-23 16:20:00	2023-06-23 16:40:00		Human landing	1	Forest	Forest and shrub					F					8	Aedes annulipes/cantans	Morphological
Poland	Śląskie	Częstochowski	PL020	PL/23/23	Myszków	Helenowka	50.5965	19.3657	Francis Schaffner	2023-06-23 16:20:00	2023-06-23 16:40:00		Human landing	1	Forest	Forest and shrub					F					6	Aedes sticticus	Morphological
Poland	Śląskie	Częstochowski	PL020	PL/23/23	Myszków	Helenowka	50.5965	19.3657	Francis Schaffner	2023-06-23 16:20:00	2023-06-23 16:40:00		Human landing	1	Forest	Forest and shrub					F					6	Aedes cinereus/geminus	Morphological
Poland	Śląskie	Częstochowski	PL021	PL/23/24	Kotowice	Zamkowa	50.6005	19.4549	Francis Schaffner	2023-06-23 17:10:00	2023-06-23 17:20:00		Larval sampling	1		Agriculture	Human-made (artificial) container	10 tyres	10 l/l	100	L, P, E						Culex pipiens/torrentium	Morphological
Poland	Śląskie	Częstochowski	PL022	PL/23/25	Lelów	r. 46	50.6852	19.626	Francis Schaffner	2023-06-23 18:20:00	2023-06-23 18:40:00		Human landing	1	Forest	Nature-wetland					F					2	Aedes annulipes/cantans	Morphological
Poland	Śląskie	Częstochowski	PL022	PL/23/25	Lelów	r. 46	50.6852	19.626	Francis Schaffner	2023-06-23 18:20:00	2023-06-23 18:40:00		Human landing	1	Forest	Nature-wetland					F					1	Aedes cinereus/geminus	Morphological
Poland	Śląskie	Sosnowiecki	PL023	PL/23/26	Lakietka	river Pilica	50.6954	19.7397	Francis Schaffner	2023-06-23 20:50:00	2023-06-23 21:10:00		Human landing	1	Grassland	Nature-wetland					F					6	Aedes annulipes/cantans	Morphological
Poland	Śląskie	Sosnowiecki	PL023	PL/23/26	Lakietka	river Pilica	50.6954	19.7397	Francis Schaffner	2023-06-23 20:50:00	2023-06-23 21:10:00		Human landing	1	Grassland	Nature-wetland					F					1	Aedes cinereus/geminus	Morphological
Poland	Śląskie	Sosnowiecki	PL023	PL/23/26	Lakietka	river Pilica	50.6954	19.7397	Francis Schaffner	2023-06-23 20:50:00	2023-06-23 21:10:00		Human landing	1	Grassland	Nature-wetland					F					2	Aedes sticticus	Morphological
Poland	Śląskie	Sosnowiecki	PL023	PL/23/26	Lakietka	river Pilica	50.6954	19.7397	Francis Schaffner	2023-06-23 20:50:00	2023-06-23 21:10:00		Human landing	1	Grassland	Nature-wetland					F					12	Coquillettidia richiardii	Morphological
Poland	Śląskie	Sosnowiecki	PL024	PL/23/27	Przyłęk	near cemetery	50.7047	19.7401	Francis Schaffner	2023-06-24 10:00:00	2023-06-24 10:10:00		Larval sampling	1		Forest and shrub	Stagnant temporary water body	pond	5 l/l	40	L2		10		1		Aedes sticticus	Morphological
Poland	Śląskie	Sosnowiecki	PL024	PL/23/27	Przyłęk	near cemetery	50.7047	19.7401	Francis Schaffner	2023-06-24 10:00:00	2023-06-24 10:10:00		Larval sampling	1		Forest and shrub	Stagnant temporary water body	pond	5 l/l	30	L2		10				Aedes cinereus/geminus	Morphological
Poland	Śląskie	Sosnowiecki	PL024	PL/23/27	Przyłęk	near cemetery	50.7047	19.7401	Francis Schaffner	2023-06-24 10:00:00	2023-06-24 10:10:00		Larval sampling	1		Forest and shrub	Stagnant temporary water body	pond	5 l/l	30	L2		10				Aedes vexans	Morphological
Poland	Świętokrzyskie	Sandomiersko-jędrzejowski	PL025	PL/23/28	Tarnawa-Wydanka	Tarnawa, near cemetery	50.5684	20.0097	Francis Schaffner	2023-06-24 10:50:00	2023-06-24 11:00:00		Human landing	1	Forest	Forest and shrub					F					8	Aedes annulipes/cantans	Morphological
Poland	Małopolskie	Miasto Kraków	PL026	PL/23/29	Kraków	Rakowicki Cemetery	50.0746	19.9524	Francis Schaffner	2023-06-24 17:20:00	2023-06-24 18:10:00	8 Culex-positive vases	Larval sampling	1		Suburban habitat	Human-made (artificial) container	50 plastic vases	50 l/l	75	E, L, P		30	16	11	5	Culex pipiens	Morphological
Poland	Małopolskie	Miasto Kraków	PL026	PL/23/29	Kraków	Rakowicki Cemetery	50.0746	19.9524	Francis Schaffner	2023-06-24 17:20:00	2023-06-24 18:10:00	8 Culex-positive vases	Larval sampling	1		Suburban habitat	Human-made (artificial) container	50 plastic vases	50 l/l	25	E, L, P		10	3	1	2	Culex torrentium	Morphological
Poland	Małopolskie	Krakowski	PL027	PL/23/30	Radziszów	Radziszów forest	49.9169	19.8279	Francis Schaffner	2023-06-25 09:15:00	2023-06-25 09:20:00		Larval sampling	1		Forest and shrub	Natural container	1 tree hole Fagus sylvativa	1 l/l	50	L2-3		1				Aedes geniculatus	Morphological
Poland	Małopolskie	Krakowski	PL027	PL/23/30	Radziszów	Radziszów forest	49.9169	19.8279	Francis Schaffner	2023-06-25 09:15:00	2023-06-25 09:20:00		Larval sampling	1		Forest and shrub	Natural container	1 tree hole Fagus sylvativa	1 l/l	50	L2-3		1				Aedes japonicus	Morphological
Poland	Małopolskie	Oświęcimski	PL028	PL/23/31	Wadowice	aleja Matki Bozej Fatimskiej, Cemetery	49.8779	19.495	Francis Schaffner	2023-06-25 10:55:00	2023-06-25 11:10:00	2 Anopheles-, 1 Aedes-positive	Larval sampling	1		Suburban habitat	Human-made (artificial) container	3 plastic vases	30 l/l	80	L1-2-3		11				Aedes japonicus	Morphological
Poland	Małopolskie	Oświęcimski	PL028	PL/23/31	Wadowice	aleja Matki Bozej Fatimskiej, Cemetery	49.8779	19.495	Francis Schaffner	2023-06-25 10:55:00	2023-06-25 11:10:00	2 Anopheles-, 1 Aedes-positive	Larval sampling	1		Suburban habitat	Human-made (artificial) container	3 plastic vases	30 l/l	20	L3-4		2	2		2	Anopheles plumbeus	Morphological
Poland	Śląskie	Bielski	PL029	PL/23/32	Bielsko-Biała	Straconka, Zloty Potok, Cemetery	49.8007	19.0953	Francis Schaffner	2023-06-25 12:20:00	2023-06-25 12:30:00	1 Culex-, 2 Aedes-positive vases and 1 barrel	Larval sampling	1		Suburban habitat	Human-made (artificial) container	3 plastic vases, 1 metal barrel	10 l/l	100	L2-3-4, P		35				Aedes japonicus	Morphological
Poland	Śląskie	Bielski	PL030	PL/23/33	Świętoszówka	Dworcova	49.8124	18.8809	Francis Schaffner	2023-06-25 14:10:00	2023-06-25 14:25:00		Larval sampling	1		Nature-wetland	(Semi-)permanent water body with vegetation	large pond border	< 1 l/l	50	L3		2				Anopheles messeae	Morphological & molecular
Poland	Śląskie	Bielski	PL030	PL/23/33	Świętoszówka	Dworcova	49.8124	18.8809	Francis Schaffner	2023-06-25 14:10:00	2023-06-25 14:25:00		Larval sampling	1		Nature-wetland	(Semi-)permanent water body with vegetation	large pond border	< 1 l/l	50	L4		2				Culex territans	Morphological
Poland	Dolnośląskie	Jeleniogórski	PL031	PL/23/34	Godzieszów	Autoport	51.2131	15.2368	Francis Schaffner	2023-09-25 08:50:00	2023-09-25 08:55:00		Larval sampling	1		Rural habitat	Human-made (artificial) container	3 tyres	30 l/l	100	L 2-3-4		20				Culex pipiens/torrentium	Morphological
Poland	Dolnośląskie	Jeleniogórski	PL032	PL/23/35	Pilze		51.2212	15.3215	Francis Schaffner	2023-09-25 09:30:00	2023-09-25 09:45:00		Larval sampling	1		Forest and shrub	Human-made (artificial) container	5 tyres	30 l/l	50	L2-3-4,P		18	4	1	3	Anopheles plumbeus	Morphological
Poland	Dolnośląskie	Jeleniogórski	PL032	PL/23/35	Pilze		51.2212	15.3215	Francis Schaffner	2023-09-25 09:30:00	2023-09-25 09:45:00		Larval sampling	1		Forest and shrub	Human-made (artificial) container	5 tyres	30 l/l	50	L2-3-4,P		8	2		2	Culex pipiens	Morphological
Poland	Dolnośląskie	Wrocławski	PL033	PL/23/36	Twardogóra	Partyzantów, Gardens	51.3611	17.4818	Francis Schaffner	2023-09-25 12:20:00	2023-09-25 12:30:00	1 positive	Larval sampling	1		Suburban habitat	Human-made (artificial) container	3 metal barrels	50 l/l	40	L3-4, P		4	9	4	5	Aedes japonicus	Morphological
Poland	Dolnośląskie	Wrocławski	PL033	PL/23/36	Twardogóra	Partyzantów, Gardens	51.3611	17.4818	Francis Schaffner	2023-09-25 12:20:00	2023-09-25 12:30:00	1 positive	Larval sampling	1		Suburban habitat	Human-made (artificial) container	3 metal barrels	50 l/l	10	L1-2-3		2				Anopheles claviger s.s.	Morphological
Poland	Dolnośląskie	Wrocławski	PL033	PL/23/36	Twardogóra	Partyzantów, Gardens	51.3611	17.4818	Francis Schaffner	2023-09-25 12:20:00	2023-09-25 12:30:00	1 positive	Larval sampling	1		Suburban habitat	Human-made (artificial) container	3 metal barrels	50 l/l	10	L1-2-3		3				Anopheles plumbeus	Morphological
Poland	Dolnośląskie	Wrocławski	PL033	PL/23/36	Twardogóra	Partyzantów, Gardens	51.3611	17.4818	Francis Schaffner	2023-09-25 12:20:00	2023-09-25 12:30:00	1 positive	Larval sampling	1		Suburban habitat	Human-made (artificial) container	3 metal barrels	50 l/l	40	L2-3-4		12				Culex pipiens/torrentium	Morphological
Poland	Miasto Łódź	Miasto Łódź	PL034	PL/23/37	Łódź	Konstantynów Łódźki, Cmentarz Katolici	51.7411	19.3202	Francis Schaffner	2023-09-25 18:20:00	2023-09-25 18:40:00		Larval sampling	1		Suburban habitat	Human-made (artificial) container	8 car tyres	20 l/l	100	L3-4, P		20				Culex pipiens/torrentium	Morphological
Poland	Miasto Łódź	Miasto Łódź	PL034	PL/23/37b	Łódź	Konstantynów Łódźki, Cmentarz Katolici	51.7393	19.319	Francis Schaffner	2023-09-25 20:00:00	2023-09-25 21:00:00		Human landing	1	Park, garden	Suburban habitat					F					2	Culex pipiens	Morphological
Poland	Miasto Łódź	Miasto Łódź	PL035	PL/23/38	Łódź	Stefana Benacha, Faculty of Biology	51.7772	19.4823	Francis Schaffner & team	2023-09-27 15:15:00	2023-09-27 15:30:00		Larval sampling	1		Suburban habitat	Human-made (artificial) container	basins	< 1 l/l	90	L2-3-4, P		12	3	1	2	Culex pipiens	Morphological
Poland	Miasto Łódź	Miasto Łódź	PL035	PL/23/38	Łódź	Stefana Benacha, Faculty of Biology	51.7772	19.4823	Francis Schaffner & team	2023-09-27 15:15:00	2023-09-27 15:30:00		Larval sampling	1		Suburban habitat	Human-made (artificial) container	basins	< 1 l/l	10	L4		2				Anopheles maculipennis s.s.	Morphological & molecular
Poland	Miasto Łódź	Miasto Łódź	PL035	PL/23/39	Łódź	Stefana Benacha, Faculty of Biology	51.7772	19.4826	Francis Schaffner	2023-09-27 15:20:00	2023-09-27 15:35:00		Human landing	1	Park, garden	Suburban habitat					F					1	Aedes vexans	Morphological
Poland	Miasto Łódź	Miasto Łódź	PL036	PL/23/40	Łódź	Telefoniczna, Cmentarz 'Doly'	51.7831	19.4859	Francis Schaffner	2023-09-28 12:10:00	2023-09-28 12:55:00	7 Culex-positive vases and 1 tyre, 1 Aedes-positive vase	Larval sampling	1		Urban habitat	Human-made (artificial) container	10 car tyres, 30 plastic vases	10 l/l	90	L3-4, P		40	7	6	1	Culex pipiens	Morphological
Poland	Miasto Łódź	Miasto Łódź	PL036	PL/23/40	Łódź	Telefoniczna, Cmentarz 'Doly'	51.7831	19.4859	Francis Schaffner	2023-09-28 12:10:00	2023-09-28 12:55:00	7 Culex-positive vases and 1 tyre, 1 Aedes-positive vase	Larval sampling	1		Urban habitat	Human-made (artificial) container	10 car tyres, 30 plastic vases	10 l/l	5	L2		1				Anopheles plumbeus	Morphological
Poland	Miasto Łódź	Miasto Łódź	PL036	PL/23/40	Łódź	Telefoniczna, Cmentarz 'Doly'	51.7831	19.4859	Francis Schaffner	2023-09-28 12:10:00	2023-09-28 12:55:00	7 Culex-positive vases and 1 tyre, 1 Aedes-positive vase	Larval sampling	1		Urban habitat	Human-made (artificial) container	10 car tyres, 30 plastic vases	10 l/l	5	L4		2				Aedes japonicus	Morphological
Poland	Miasto Łódź	Miasto Łódź	PL035	PL/23/41	Łódź	Stefana Benacha, Faculty of Biology	51.7767	19.4838	Francis Schaffner & team	2023-09-27 16:30:00	2023-09-28 09:30:00	1 EVS+dry ice, 1 CDC + bottle, 1 BGS	CO2-baited traps	1	Park, garden	Suburban habitat					F					10	Culex pipiens	Morphological
Poland	Miasto Łódź	Miasto Łódź	PL035	PL/23/41	Łódź	Stefana Benacha, Faculty of Biology	51.7767	19.4838	Francis Schaffner & team	2023-09-27 16:30:00	2023-09-28 09:30:00	1 EVS+dry ice, 1 CDC + bottle, 1 BGS	CO2-baited traps	1	Park, garden	Suburban habitat					F					1	Culiseta annulata	Morphological
Poland	Miasto Łódź	Miasto Łódź	PL037	PL/23/42	Łódź	Lagiewniki, Arturóvek	51.8214	19.4794	Francis Schaffner & team	2023-09-28 16:15:00	2023-09-28 16:25:00		Larval sampling	1		Nature-wetland	(Semi-)permanent water body with vegetation	dip border	< 1 l/l	30	L1-2-3-4		10				Culex pipiens/torrentium	Morphological
Poland	Miasto Łódź	Miasto Łódź	PL037	PL/23/42	Łódź	Lagiewniki, Arturóvek	51.8214	19.4794	Francis Schaffner & team	2023-09-28 16:15:00	2023-09-28 16:25:00		Larval sampling	1		Nature-wetland	(Semi-)permanent water body with vegetation	dip border	< 1 l/l	60	L1-2-3-4, P		30	5	3	2	Culiseta annulata	Morphological
Poland	Miasto Łódź	Miasto Łódź	PL037	PL/23/42	Łódź	Lagiewniki, Arturóvek	51.8214	19.4794	Francis Schaffner & team	2023-09-28 16:15:00	2023-09-28 16:25:00		Larval sampling	1		Nature-wetland	(Semi-)permanent water body with vegetation	dip border	< 1 l/l	10	P			2	1	1	Culex territans	Morphological
Poland	Łódzkie	Łódzki	PL038	PL/23/43	Róźyca	Kaletnik, Cmentarna	51.7241	19.7828	Francis Schaffner	2023-09-29 15:45:00	2023-09-29 15:55:00		Larval sampling	1		Suburban habitat	Human-made (artificial) container	2 large pots	15 l/l	60	L3-4, P		10	1	1		Culex pipiens	Morphological
Poland	Łódzkie	Łódzki	PL038	PL/23/43	Róźyca	Kaletnik, Cmentarna	51.7241	19.7828	Francis Schaffner	2023-09-29 15:45:00	2023-09-29 15:55:00		Larval sampling	1		Suburban habitat	Human-made (artificial) container	2 large pots	15 l/l	40	L4, P		6	1	1		Aedes japonicus	Morphological
Poland	Łódzkie	Piotrkowski	PL039	PL/23/44	Tomaszów Mazowiecki	Carska Wieża	51.5341	20.1137	Francis Schaffner	2023-09-29 16:55:00	2023-09-29 17:10:00		Larval sampling	1		Nature-wetland	(Semi-)permanent water body with vegetation	marsh	< 1 l/l	70	L, P		6				Anopheles claviger s.s.	Morphological
Poland	Łódzkie	Piotrkowski	PL039	PL/23/44	Tomaszów Mazowiecki	Carska Wieża	51.5341	20.1137	Francis Schaffner	2023-09-29 16:55:00	2023-09-29 17:10:00		Larval sampling	1		Nature-wetland	(Semi-)permanent water body with vegetation	marsh	< 1 l/l	10	L, P		1				Culiseta annulata	Morphological
Poland	Łódzkie	Piotrkowski	PL039	PL/23/44	Tomaszów Mazowiecki	Carska Wieża	51.5341	20.1137	Francis Schaffner	2023-09-29 16:55:00	2023-09-29 17:10:00		Larval sampling	1		Nature-wetland	(Semi-)permanent water body with vegetation	marsh	< 1 l/l	10	L, P		1				Aedes vexans	Morphological
Poland	Łódzkie	Piotrkowski	PL039	PL/23/44	Tomaszów Mazowiecki	Carska Wieża	51.5341	20.1137	Francis Schaffner	2023-09-29 16:55:00	2023-09-29 17:10:00		Larval sampling	1		Nature-wetland	(Semi-)permanent water body with vegetation	marsh	< 1 l/l	10	L, P		1				Aedes cinereus/geminus	Morphological
Poland	Łódzkie	Piotrkowski	PL040	PL/23/45	Tomaszów Mazowiecki	Ciebłowice Małe	51.5338	20.0846	Francis Schaffner	2023-09-29 17:20:00	2023-09-29 17:35:00		Human landing	1	Wetland	Nature-wetland					F					8	Aedes vexans	Morphological
Poland	Łódzkie	Piotrkowski	PL040	PL/23/45	Tomaszów Mazowiecki	Ciebłowice Małe	51.5338	20.0846	Francis Schaffner	2023-09-29 17:20:00	2023-09-29 17:35:00		Human landing	1	Wetland	Nature-wetland					F					6	Aedes cinereus/geminus	Morphological
Poland	Łódzkie	Piotrkowski	PL040	PL/23/45	Tomaszów Mazowiecki	Ciebłowice Małe	51.5338	20.0846	Francis Schaffner	2023-09-29 17:20:00	2023-09-29 17:35:00		Human landing	1	Wetland	Nature-wetland					F					1	Aedes annulipes/cantans	Morphological
Poland	Łódzkie	Piotrkowski	PL041	PL/23/46	Poświetne	Jaśminowa, Cmentarz	51.5366	20.3538	Francis Schaffner	2023-09-29 18:20:00	2023-09-29 18:40:00	4 Culex-positive vases	Larval sampling	1		Suburban habitat	Human-made (artificial) container	12 vases and pots	10 l/l	100	L4, P		12	6	1	5	Culex pipiens	Morphological
Poland	Mazowiecki regionalny	Radomski	PL041b	PL/23/46bis	Skrzyńsko	Przemysłowa, Cmentarz	51.3739	20.6396	Francis Schaffner	2023-09-30 09:15:00	2023-09-30 09:35:00	2 Culex-positive tyres	Larval sampling	1		Forest and shrub	Human-made (artificial) container	7 car tyres, 5 vases	5 l/l	100	L3-4, P		20				Culex pipiens/torrentium	Morphological
Poland	Świętokrzyskie	Kielecki	PL042	PL/23/47	Osielde Dolna Kamienna I	Piękna	51.1094	20.9105	Francis Schaffner	2023-09-30 12:05:00	2023-09-30 12:18:00		Larval sampling	1		Forest and shrub	Human-made (artificial) container	2 tyres		100	L2-3-4		12				Culex pipiens/torrentium	Morphological
Poland	Świętokrzyskie	Kielecki	PL043	PL/23/48	Kielce	Ogrody Działkowe	50.8891	20.6816	Francis Schaffner	2023-09-30 14:05:00	2023-09-30 14:15:00		Larval sampling	1		Suburban habitat	Human-made (artificial) container	metal buckets	3 l/l	60	L3-4, P		5	3	3		Culex pipiens	Morphological
Poland	Świętokrzyskie	Kielecki	PL043	PL/23/48	Kielce	Ogrody Działkowe	50.8891	20.6816	Francis Schaffner	2023-09-30 14:05:00	2023-09-30 14:15:00		Larval sampling	1		Suburban habitat	Human-made (artificial) container	metal buckets	3 l/l	10	L3		2				Anopheles petragnani	Morphological & molecular
Poland	Świętokrzyskie	Kielecki	PL043	PL/23/48	Kielce	Ogrody Działkowe	50.8891	20.6816	Francis Schaffner	2023-09-30 14:05:00	2023-09-30 14:15:00		Larval sampling	1		Suburban habitat	Human-made (artificial) container	metal buckets	3 l/l	30	P			5	1	4	Aedes japonicus	Morphological
Poland	Świętokrzyskie	Sandomiersko-jędrzejowski	PL044	PL/23/49	Słaszów	Spokojna	50.5679	21.1755	Francis Schaffner	2023-09-30 17:00:00	2023-09-30 17:10:00		Larval sampling	1		Urban habitat	Human-made (artificial) container	1 catch basin	3 l/l	100	L4, P		4	6	2	4	Culex pipiens	Morphological
Poland	Świętokrzyskie	Sandomiersko-jędrzejowski	PL045	PL/23/50	Strzegom	Cmentarz	50.5118	21.3152	Francis Schaffner	2023-09-30 17:20:00	2023-09-30 17:30:00		Larval sampling	1		Rural habitat	Human-made (artificial) container	1 catch basin	100 l/l,	100	L3, P		18	1			Aedes japonicus	Morphological
Poland	Małopolskie	Tarnowski	PL046	PL/23/51	Błonie	Cmentarz	49.9566	20.8873	Francis Schaffner	2023-10-01 08:25:00	2023-10-01 08:35:00		Larval sampling	1		Nature-wetland	Stagnant temporary water body	small pond along road	3 l/l	20	L4, P		3	1		1	Aedes cinereus/geminus	Morphological
Poland	Małopolskie	Tarnowski	PL046	PL/23/51	Błonie	Cmentarz	49.9566	20.8873	Francis Schaffner	2023-10-01 08:25:00	2023-10-01 08:35:00		Larval sampling	1		Nature-wetland	Stagnant temporary water body	small pond along road	3 l/l	20	L3-4		6				Culiseta annulata	Morphological
Poland	Małopolskie	Tarnowski	PL046	PL/23/51	Błonie	Cmentarz	49.9566	20.8873	Francis Schaffner	2023-10-01 08:25:00	2023-10-01 08:35:00		Larval sampling	1		Nature-wetland	Stagnant temporary water body	small pond along road	3 l/l	40	L3-4, P		7	3	1	2	Culex pipiens	Morphological
Poland	Małopolskie	Tarnowski	PL046	PL/23/51	Błonie	Cmentarz	49.9566	20.8873	Francis Schaffner	2023-10-01 08:25:00	2023-10-01 08:35:00		Larval sampling	1		Nature-wetland	Stagnant temporary water body	small pond along road	3 l/l	20	L2		5				Anopheles claviger s.s.	Morphological
Poland	Małopolskie	Tarnowski	PL047	PL/23/52	Błonie		49.959	20.8879	Francis Schaffner	2023-10-01 08:45:00	2023-10-01 08:50:00		Larval sampling	1		Suburban habitat	Human-made (artificial) container	2 vases	100 l/l	20	L2		5				Culex pipiens/torrentium	Morphological
Poland	Małopolskie	Tarnowski	PL047	PL/23/52	Błonie		49.959	20.8879	Francis Schaffner	2023-10-01 08:45:00	2023-10-01 08:50:00		Larval sampling	1		Suburban habitat	Human-made (artificial) container	2 vases	100 l/l	80	L2-3		20				Aedes japonicus	Morphological
Poland	Małopolskie	Nowosądecki	PL048	PL/23/53	Sienna	Heron Live	49.7205	20.7012	Francis Schaffner	2023-10-01 10:00:00	2023-10-01 10:10:00		Larval sampling	1		Forest and shrub	Human-made (artificial) container	1 truck tyre, 4 plastic trash bags	1 l/l	70	L2-3-4, P, F		5	12	4	9	Aedes japonicus	Morphological
Poland	Małopolskie	Nowosądecki	PL048	PL/23/53	Sienna	Heron Live	49.7205	20.7012	Francis Schaffner	2023-10-01 10:00:00	2023-10-01 10:10:00		Larval sampling	1		Forest and shrub	Human-made (artificial) container	1 truck tyre, 4 plastic trash bags	1 l/l	30	L2		5				Anopheles plumbeus	Morphological
Poland	Małopolskie	Nowotarski	PL049	PL/23/54	Ochotnica Dolna	Cmentarz	49.5243	20.3321	Francis Schaffner	2023-10-01 11:20:00	2023-10-01 11:30:00	1 positive vase	Larval sampling	1		Suburban habitat	Human-made (artificial) container	4 plastic vases	30 l/l	100	L1-2-3-4		9				Aedes japonicus	Morphological
Poland	Małopolskie	Nowosądecki	PL050	PL/23/55	Stadła	r 969	49.581	20.6174	Francis Schaffner	2023-10-01 12:00:00	2023-10-01 12:15:00		Larval sampling	1		Nature-wetland	(Semi-)permanent water body with vegetation	marsh border	< 1 l/l	30	L2		2				Anopheles claviger s.s.	Morphological
Poland	Małopolskie	Nowosądecki	PL050	PL/23/55	Stadła	r 969	49.581	20.6174	Francis Schaffner	2023-10-01 12:00:00	2023-10-01 12:15:00		Larval sampling	1		Nature-wetland	(Semi-)permanent water body with vegetation	marsh border	< 1 l/l	70	L2-3, P		3	3	1	2	Anopheles daciae	Morphological & molecular
Poland	Małopolskie	Nowosądecki	PL050	PL/23/56	Stadła	r 969	49.5808	20.6171	Francis Schaffner	2023-10-01 12:25:00	2023-10-01 12:35:00		Larval sampling	1		Nature-wetland	Stagnant temporary water body	puddles along gravel road	5 l/l	15	L4		2				Aedes vexans	Morphological
Poland	Małopolskie	Nowosądecki	PL050	PL/23/56	Stadła	r 969	49.5808	20.6171	Francis Schaffner	2023-10-01 12:25:00	2023-10-01 12:35:00		Larval sampling	1		Nature-wetland	Stagnant temporary water body	puddles along gravel road	5 l/l	15	L4		2		1	1	Aedes geminus	Morphological
Poland	Małopolskie	Nowosądecki	PL050	PL/23/56	Stadła	r 969	49.5808	20.6171	Francis Schaffner	2023-10-01 12:25:00	2023-10-01 12:35:00		Larval sampling	1		Nature-wetland	Stagnant temporary water body	puddles along gravel road	5 l/l	55	l3		8				Anopheles claviger s.s.	Morphological
Poland	Małopolskie	Nowosądecki	PL050	PL/23/56	Stadła	r 969	49.5808	20.6171	Francis Schaffner	2023-10-01 12:25:00	2023-10-01 12:35:00		Larval sampling	1		Nature-wetland	Stagnant temporary water body	puddles along gravel road	5 l/l	15	L3-4		2				Anopheles maculipennis s.s.	Morphological & molecular
Poland	Podkarpackie	Krośnieński	PL051	PL/23/57	Trzcinica	Cmentarz	49.7378	21.4035	Francis Schaffner	2023-10-01 14:40:00	2023-10-01 14:50:00		Larval sampling	1		Suburban habitat	Human-made (artificial) container	1 vase	50l/l	100	L3-4, P		13	1		1	Aedes japonicus	Morphological
Poland	Podkarpackie	Krośnieński	PL051	PL/23/58	Trzcinica	Cmentarz	49.737	21.4038	Francis Schaffner	2023-10-01 14:50:00	2023-10-01 15:00:00		Larval sampling	1		Suburban habitat	Stagnant temporary water body	dip along path	< 1 l/l	50	L4		2				Anopheles maculipennis s.s.	Morphological & molecular
Poland	Podkarpackie	Krośnieński	PL051	PL/23/58	Trzcinica	Cmentarz	49.737	21.4038	Francis Schaffner	2023-10-01 14:50:00	2023-10-01 15:00:00		Larval sampling	1		Suburban habitat	Stagnant temporary water body	dip along path	< 1 l/l	50	P			1	1		Culex pipiens	Morphological
Poland	Podkarpackie	Krośnieński	PL052	PL/23/59	Widacz	r 990, Źródło	49.8117	21.6355	Francis Schaffner	2023-10-01 15:50:00	2023-10-01 16:00:00		Larval sampling	1		Nature-other	Stagnant temporary water body	puddles/ditch along road	2 l/l	100	L3-4, P		7	5	4	1	Culex pipiens	Morphological
Poland	Podkarpackie	Rzeszowski	PL053	PL/23/60	Lubenia	Face Cmentarz	49.9327	21.9218	Francis Schaffner	2023-10-01 16:45:00	2023-10-01 16:50:00		Larval sampling	1		Rural habitat	Human-made (artificial) container	1 tyre	40 l/l	100	L2-3-4		5				Aedes japonicus	Morphological
Poland	Podkarpackie	Przemyski	PL054	PL/23/61	Radymno	Cmentarz	49.9485	22.826	Francis Schaffner	2023-10-01 18:20:00	2023-10-01 18:35:00	5 positive vases	Larval sampling	1		Suburban habitat	Human-made (artificial) container	12 vases	20 l/l	100	L3-4, P		25	6		6	Culex pipiens	Morphological
Poland	Podkarpackie	Przemyski	PL054	PL/23/62	Radymno	Kósciuszki	49.9564	22.8215	Francis Schaffner	2023-10-02 08:20:00	2023-10-02 08:35:00		Larval sampling	1		Suburban habitat	Human-made (artificial) container	1 bath tube, 1 barrel	50 l/l	100	L2-3-4, P		30				Culex pipiens/torrentium	Morphological
Poland	Podkarpackie	Przemyski	PL055	PL/23/63	Jarosław	Cmentarz	50.0134	22.6701	Francis Schaffner	2023-10-02 09:15:00	2023-10-02 09:35:00	5 positive vases	Larval sampling	1		Suburban habitat	Human-made (artificial) container	30 plastic vases	50 l/l	100	L2-3-4, P		25				Culex pipiens/torrentium	Morphological
Poland	Podkarpackie	Przemyski	PL056	PL/23/64	Jarosław	Park	50.0213	22.6673	Francis Schaffner	2023-10-02 19:55:00	2023-10-02 10:00:00		Larval sampling	1		Suburban habitat	Natural container	1 tree hole Acer pseudoplatanus	5 l/l	100	L2		2				Anopheles plumbeus	Morphological
Poland	Podkarpackie	Przemyski	PL056	PL/23/65	Jarosław	Raszyńska	50.0228	22.6664	Francis Schaffner	2023-10-02 10:15:00	2023-10-02 10:15:00		Larval sampling	1		Suburban habitat	Human-made (artificial) container	2 buckets, 1 bath tube	30 l/l	100	L2-3-4		30				Culex pipiens/torrentium	Morphological
Poland	Podkarpackie	Tarnobrzeski	PL057	PL/23/66	Leżajsk	Cmentarz żydowski	50.2507	22.4229	Francis Schaffner	2023-10-02 11:20:00	2023-10-02 11:30:00		Larval sampling	1		Suburban habitat	Natural container	2 tree holes Acer pseudoplatanus	50 l/l	100	L1-2		20				Anopheles plumbeus	Morphological
Poland	Podkarpackie	Tarnobrzeski	PL057	PL/23/67	Leżajsk	Karola Szymanowskiego	50.2502	22.4234	Francis Schaffner	2023-10-02 11:30:00	2023-10-02 11:45:00		Larval sampling	1		Suburban habitat	Human-made (artificial) container	1 car tyre		100	L1-2-3		5				Anopheles plumbeus	Morphological
Poland	Podkarpackie	Tarnobrzeski	PL058	PL/23/68	Dąbrówka	Cmentarz	50.5052	22.3122	Francis Schaffner	2023-10-02 13:40:00	2023-10-02 13:50:00	1 positive vase	Larval sampling	1		Rural habitat	Human-made (artificial) container	5 vases	50 l/l	100	L2-3-4, P		20				Culex pipiens/torrentium	Morphological
Poland	Podkarpackie	Tarnobrzeski	PL059	PL/23/69	Dąbrówka	Bagno	50.5077	22.3194	Francis Schaffner	2023-10-03 04:05:00	2023-10-02 14:10:00		Larval sampling	1		Forest and shrub	Stagnant temporary water body	small pool/puddle	3 l/l	40	L2-3-4		7				Culex pipiens/torrentium	Morphological
Poland	Podkarpackie	Tarnobrzeski	PL059	PL/23/69	Dąbrówka	Bagno	50.5077	22.3194	Francis Schaffner	2023-10-03 04:05:00	2023-10-02 14:10:00		Larval sampling	1		Forest and shrub	Stagnant temporary water body	small pool/puddle	3 l/l	60	L2-3-4		13				Culiseta annulata	Morphological
Poland	Podkarpackie	Tarnobrzeski	PL060	PL060	Kurzina Mala	Cmentarz	50.5164	22.3666	Francis Schaffner	2023-10-02 14:20:00	2023-10-02 14:35:00		Larval sampling	0		Rural habitat	Human-made (artificial) container	4 vases, tarpaulin
Poland	Lubelskie	Chełmsko-zamojski	PL061	PL/23/70	Biłgóraj	Cmentarz Lapidarium	50.5419	22.7372	Francis Schaffner	2023-10-02 15:15:00	2023-10-02 15:40:00		Larval sampling	1		Suburban habitat	Human-made (artificial) container	3 barrels, 1 bucket, 1 bath tube	100 l/l	98	L2-3-4		30				Culex pipiens/torrentium	Morphological
Poland	Lubelskie	Chełmsko-zamojski	PL061	PL/23/70	Biłgóraj	Cmentarz Lapidarium	50.5419	22.7372	Francis Schaffner	2023-10-02 15:15:00	2023-10-02 15:40:00		Larval sampling	1		Suburban habitat	Human-made (artificial) container	3 barrels, 1 bucket, 1 bath tube	100 l/l	2	P			1		1	Anopheles claviger s.s.	Morphological & molecular
Poland	Lubelskie	Chełmsko-zamojski	PL062	PL/23/71	Biłgóraj	Kalinowa, Ogródki dzialkowe	50.5434	22.7132	Francis Schaffner	2023-10-02 16:00:00	2023-10-02 16:10:00		Larval sampling	1		Suburban habitat	Human-made (artificial) container	5 vases, tarpaulins	5 l/l	80	L3-4		50				Culex pipiens/torrentium	Morphological
Poland	Lubelskie	Chełmsko-zamojski	PL062	PL/23/71	Biłgóraj	Kalinowa, Ogródki dzialkowe	50.5434	22.7132	Francis Schaffner	2023-10-02 16:00:00	2023-10-02 16:10:00		Larval sampling	1		Suburban habitat	Human-made (artificial) container	5 vases, tarpaulins	5 l/l	20	L4		10				Culex territans	Morphological
Poland	Lubelskie	Puławski	PL063	PL063	Kraśnik	Cmentarz	50.9208	22.21	Francis Schaffner	2023-10-02 18:15:00	2023-10-02 18:45:00		Larval sampling	0		Suburban habitat	Human-made (artificial) container	10 vases
Poland	Lubelskie	Lubelski	PL064	PL064	Krężnica Jara	Cmentarz	51.1484	22.4703	Francis Schaffner	2023-10-03 08:15:00	2023-10-03 08:35:00		Larval sampling	0		Rural habitat	Human-made (artificial) container	10 vases
Poland	Lubelskie	Lubelski	PL065	PL/23/72	Krężnica Jara		51.1457	22.462	Francis Schaffner	2023-10-03 08:50:00	2023-10-03 09:05:00		Larval sampling	1		Forest and shrub	Stagnant temporary water body	pond/ditch along road and forest	< 1 l/l	10	P			1	1		Aedes sticticus	Morphological
Poland	Lubelskie	Lubelski	PL065	PL/23/72	Krężnica Jara		51.1457	22.462	Francis Schaffner	2023-10-03 08:50:00	2023-10-03 09:05:00		Larval sampling	1		Forest and shrub	Stagnant temporary water body	pond/ditch along road and forest	< 1 l/l	20	L3		3				Anopheles claviger s.s.	Morphological
Poland	Lubelskie	Lubelski	PL065	PL/23/72	Krężnica Jara		51.1457	22.462	Francis Schaffner	2023-10-03 08:50:00	2023-10-03 09:05:00		Larval sampling	1		Forest and shrub	Stagnant temporary water body	pond/ditch along road and forest	< 1 l/l	20	L2		3				Culex pipiens/torrentium	Morphological
Poland	Lubelskie	Lubelski	PL065	PL/23/72	Krężnica Jara		51.1457	22.462	Francis Schaffner	2023-10-03 08:50:00	2023-10-03 09:05:00		Larval sampling	1		Forest and shrub	Stagnant temporary water body	pond/ditch along road and forest	< 1 l/l	50	L3-4		7				Culiseta annulata	Morphological
Poland	Lubelskie	Lubelski	PL066	PL/23/73	Lublin	Cmentarz "Majdanek"	51.2195	22.6069	Francis Schaffner	2023-10-03 10:10:00	2023-10-03 10:10:00	1 positive vase	Larval sampling	1		Suburban habitat	Human-made (artificial) container	17 vases	200 l/l	100	L3-4		30				Culex pipiens/torrentium	Morphological
Poland	Lubelskie	Lubelski	PL067	PL/23/74	Garbóv	Kościelna, Cmentarz	51.3482	22.3497	Francis Schaffner	2023-10-03 11:20:00	2023-10-03 11:40:00	1 positive vase	Larval sampling	1		Rural habitat	Human-made (artificial) container	11 vases	150 l/l	100	L3-4		30				Culex pipiens/torrentium	Morphological
Poland	Lubelskie	Puławski	PL068	PL/23/75	Puławy	Piaskova, Cmentarz	51.4249	21.9531	Francis Schaffner	2023-10-03 12:30:00	2023-10-03 12:50:00	1 positive vase	Larval sampling	1		Suburban habitat	Human-made (artificial) container	20 vases	40 l/l	100	L1-2-3		9				Anopheles plumbeus	Morphological
Poland	Lubelskie	Puławski	PL069	PL/23/76	Puławy	4 Pulku Piechoty, Rodzinny Ogród	51.4074	21.9538	Francis Schaffner	2023-10-03 13:25:00	2023-10-03 13:45:00		Larval sampling	1		Suburban habitat	Human-made (artificial) container	12 rain water barrels	50 l/l	100	L4, P		4	13	7	6	Culex pipiens	Morphological
Poland	Mazowiecki regionalny	Radomski	PL070	PL/23/77	Pionky	Kozienicka, Cmentarz	51.4816	21.4351	Francis Schaffner	2023-10-03 15:05:00	2023-10-03 15:25:00	1 positive vase	Larval sampling	1		Rural habitat	Human-made (artificial) container	12 vases	150 l/l	100	L3-4		25				Culex pipiens/torrentium	Morphological
Poland	Mazowiecki regionalny	Radomski	PL071	PL/23/78a	Cecylówka-Brzózka		51.5518	21.3689	Francis Schaffner	2023-10-03 15:55:00	2023-10-03 16:05:00		Larval sampling	1		Forest and shrub	Human-made (artificial) container	10 tyres, 4 buckets	20 l/l	20	L3-4		8				Aedes geniculatus	Morphological
Poland	Mazowiecki regionalny	Radomski	PL071	PL/23/78a	Cecylówka-Brzózka		51.5518	21.3689	Francis Schaffner	2023-10-03 15:55:00	2023-10-03 16:05:00		Larval sampling	1		Forest and shrub	Human-made (artificial) container	10 tyres, 4 buckets	20 l/l	50	L2-3-4, P		12	10	5	5	Culex pipiens	Morphological
Poland	Mazowiecki regionalny	Radomski	PL071	PL/23/78a	Cecylówka-Brzózka		51.5518	21.3689	Francis Schaffner	2023-10-03 15:55:00	2023-10-03 16:05:00		Larval sampling	1		Forest and shrub	Human-made (artificial) container	10 tyres, 4 buckets	20 l/l	15	L4, P		5	1	1		Culiseta annulata	Morphological
Poland	Mazowiecki regionalny	Radomski	PL071	PL/23/78a	Cecylówka-Brzózka		51.5518	21.3689	Francis Schaffner	2023-10-03 15:55:00	2023-10-03 16:05:00		Larval sampling	1		Forest and shrub	Human-made (artificial) container	10 tyres, 4 buckets	20 l/l	13	L2		5				Anopheles plumbeus	Morphological
Poland	Mazowiecki regionalny	Radomski	PL071	PL/23/78a	Cecylówka-Brzózka		51.5518	21.3689	Francis Schaffner	2023-10-03 15:55:00	2023-10-03 16:05:00		Larval sampling	1		Forest and shrub	Human-made (artificial) container	10 tyres, 4 buckets	20 l/l	2	P			1		1	Culex hortensis	Morphological
Poland	Mazowiecki regionalny	Radomski	PL071	PL/23/78b	Cecylówka-Brzózka		51.5518	21.3689	Francis Schaffner	2023-10-03 16:00:00	2023-10-03 16:10:00		Human landing	1	Forest	Forest and shrub					F					1	Aedes geniculatus	Morphological
Poland	Mazowiecki regionalny	Żyrardowski	PL072	PL072	Grójec	Mszczonowska, Cmentarz	51.8666	20.8565	Francis Schaffner	2023-10-03 17:10:00	2023-10-03 17:30:00		Larval sampling	0		Suburban habitat	Human-made (artificial) container	13 vases/buckets
Poland	Mazowiecki regionalny	Żyrardowski	PL073	PL/23/79	Jeziórka	Cmentarz	51.882	20.7552	Francis Schaffner	2023-10-03 17:50:00	2023-10-03 18:05:00	2 positive vases	Larval sampling	1		Rural habitat	Human-made (artificial) container	7 vases/buckets	80 l/l	100	L3-4, P		30				Culex pipiens/torrentium	Morphological
Poland	Łódzkie	Skierniewicki	PL074	PL074a	Skierniewice	Uniil Europejskiej	51.9712	20.1849	Francis Schaffner	2023-10-04 08:15:00	2023-10-04 08:35:00		Larval sampling	0		Suburban habitat	Human-made (artificial) container	10 car tyres
Poland	Łódzkie	Skierniewicki	PL074	PL/23/80	Skierniewice	Strobowska, Cmentarz	51.9338	20.1609	Francis Schaffner	2023-10-04 09:00:00	2023-10-04 09:15:00	1 positive vase	Larval sampling	1		Suburban habitat	Human-made (artificial) container	11 vases/buckets		100	L3-4		20				Culex pipiens/torrentium	Morphological
Poland	Łódzkie	Skierniewicki	PL075	PL075	Źakowice		52.1891	19.4291	Francis Schaffner	2023-10-04 10:40:00	2023-10-04 11:00:00		Larval sampling	0		Agriculture	Human-made (artificial) container	12 tyres
Poland	Łódzkie	Skierniewicki	PL075	PL/23/81	Źakowice		52.1884	19.4379	Francis Schaffner	2023-10-04 11:10:00	2023-10-04 11:20:00	tarpaulin and 10 positive tyres	Larval sampling	1		Agriculture	Human-made (artificial) container	30 tyres, tarpaulin	80 l/l	100	L2-3-4, P		21	2	2		Culex pipiens	Morphological
Poland	Łódzkie	Skierniewicki	PL076	PL076	Źurawieniek	Golębiew Nowy, Cmentarz	52.2629	19.372	Francis Schaffner	2023-10-04 11:45:00	2023-10-04 12:05:00		Larval sampling	0		Suburban habitat	Human-made (artificial) container	18 vases/buckets
Poland	Łódzkie	Sieradzki	PL077	PL/23/82	Wilkowice	Tur	51.9393	18.994	Francis Schaffner	2023-10-04 13:40:00	2023-10-04 13:50:00		Larval sampling	1		Agriculture	Human-made (artificial) container	5 large tyres	30 l/l	100	L3-4		25				Culex pipiens/torrentium	Morphological
Poland	Łódzkie	Sieradzki	PL078	PL078	Niemysłóv	r 478, Cmentarz	51.8643	18.8135	Francis Schaffner	2023-10-04 15:00:00	2023-10-04 15:15:00		Larval sampling	0		Rural habitat	Human-made (artificial) container	11 vases/buckets
Poland	Łódzkie	Sieradzki	PL079	PL/23/83	Jeziorsko	r 83, Cmentarz	51.795	18.6466	Francis Schaffner	2023-10-04 15:40:00	2023-10-04 15:55:00	2 positive vases	Larval sampling	1		Suburban habitat	Human-made (artificial) container	10 vases/buckets	50 l/l	100	L3-4		25				Culex pipiens/torrentium	Morphological
Poland	Łódzkie	Sieradzki	PL080	PL/23/84	Warta	r 710, Łódzka	51.7158	18.6342	Francis Schaffner	2023-10-04 16:05:00	2023-10-04 16:15:00		Larval sampling	1		Agriculture	Stagnant temporary water body	marsh	< 1 l/l	100	L2-3		3				Anopheles claviger s.s.	Morphological
Poland	Wielkopolskie	Kaliski	PL081	PL081	Brzeziny	Dębowa, Cmentarz	51.6003	18.2533	Francis Schaffner	2023-10-04 17:05:00	2023-10-04 17:20:00		Larval sampling	0		Suburban habitat	Human-made (artificial) container	7 vases/buckets
Poland	Wielkopolskie	Kaliski	PL082	PL082	Kaczory	r 444	51.6014	17.5918	Francis Schaffner	2023-10-05 07:15:00	2023-10-05 07:35:00		Larval sampling	0		Forest and shrub	Human-made (artificial) container	1 tyre
Poland	Wielkopolskie	Kaliski	PL083	PL083	Sośnie	Wielkopolska, Cmentarz	51.4724	17.6334	Francis Schaffner	2023-10-05 08:15:00	2023-10-05 08:30:00		Larval sampling	0		Suburban habitat	Human-made (artificial) container	8 vases/buckets
Poland	Wielkopolskie	Leszczyński	PL084	PL/23/85	Niedżwiadki		51.5918	17.0015	Francis Schaffner	2023-10-05 10:10:00	2023-10-05 10:30:00		Larval sampling	1		Forest and shrub	Stagnant temporary water body	pond in forest	< 1 l/l	60	L2-3-4, P		13	1			Culiseta annulata	Morphological
Poland	Wielkopolskie	Leszczyński	PL084	PL/23/85	Niedżwiadki		51.5918	17.0015	Francis Schaffner	2023-10-05 10:10:00	2023-10-05 10:30:00		Larval sampling	1		Forest and shrub	Stagnant temporary water body	pond in forest	< 1 l/l	40	L4		10				Culex pipiens/torrentium	Morphological
Poland	Wielkopolskie	Leszczyński	PL085	PL/23/86	Rawicz	Źwirowa, Cmentarz	51.6058	16.8481	Francis Schaffner	2023-10-05 11:20:00	2023-10-05 11:30:00	1 positive vase	Larval sampling	1		Suburban habitat	Human-made (artificial) container	18 vases/buckets	20 l/l	100	L3-4		20				Culex pipiens/torrentium	Morphological
Poland	Wielkopolskie	Leszczyński	PL086	PL/23/87	Leszno		51.8155	16.5846	Francis Schaffner	2023-10-05 13:10:00	2023-10-05 13:35:00		Larval sampling	1		Forest and shrub	Human-made (artificial) container	5 tyres		100	L3-4		20				Culex pipiens/torrentium	Morphological
Poland	Dolnośląskie	Legnicko-głogowski	PL087	PL/23/88a	Kietlów	Osetno Male	51.6294	16.4621	Francis Schaffner	2023-10-05 14:20:00	2023-10-05 14:45:00		Human landing	1	Wetland	Nature-wetland					F					3	Aedes vexans	Morphological
Poland	Dolnośląskie	Legnicko-głogowski	PL087	PL/23/88b	Kietlów	Osetno Male	51.6294	16.4621	Francis Schaffner	2023-10-05 14:20:00	2023-10-05 14:45:00		Resting catch	1	Wetland	Nature-wetland					M				1		Culex pipiens	Morphological
Poland	Dolnośląskie	Legnicko-głogowski	PL087	PL/23/88b	Kietlów	Osetno Male	51.6294	16.4621	Francis Schaffner	2023-10-05 14:20:00	2023-10-05 14:45:00		Resting catch	1	Wetland	Nature-wetland					M				1		Culex territans	Morphological
Poland	Dolnośląskie	Legnicko-głogowski	PL088	PL/23/89	Równa	r 333, Luboszyce	51.6089	16.4149	Francis Schaffner	2023-10-05 15:00:00	2023-10-05 15:10:00	20 positive tyres	Larval sampling	1		Agriculture	Human-made (artificial) container	30 large tyres	20 l/l	100	L2-3-4, P		50				Culex pipiens/torrentium	Morphological
Poland	Dolnośląskie	Legnicko-głogowski	PL089	PL/23/90	Równa	r 333, Luboszyce	51.6083	16.4154	Francis Schaffner	2023-10-05 15:15:00	2023-10-05 15:25:00		Larval sampling	1		Agriculture	(Semi-)permanent water body with vegetation	pond	< 1 l/l	100	L4		4				Anopheles maculipennis s.s.	Morphological & molecular
Poland	Dolnośląskie	Legnicko-głogowski	PL090	PL/23/91	Równa	r 333, Luboszyce	51.6097	16.4157	Francis Schaffner	2023-10-05 15:30:00	2023-10-05 15:40:00		Larval sampling	1		Rural habitat	Human-made (artificial) container	concrete pit in ditch	2 l/l	100	L3-4, P		11	5	1	4	Culex pipiens	Morphological
Poland	Dolnośląskie	Legnicko-głogowski	PL091	PL091	Polkowice	Spokojna, Cmentarz	51.5128	16.0822	Francis Schaffner	2023-10-05 16:45:00	2023-10-05 16:55:00		Larval sampling	0		Suburban habitat	Human-made (artificial) container	18 vases/buckets, 2 tyres
Poland	Lubuskie	Zielonogórski	PL092	PL092	Ptzyborów	Cmentarna, Cmentarz	51.8046	15.7692	Francis Schaffner	2023-10-05 17:30:00	2023-10-05 17:45:00		Larval sampling	0		Rural habitat	Human-made (artificial) container	7 vases/buckets
Poland	Lubuskie	Zielonogórski	PL093	PL093	Sucha	Cmentarz	51.8786	15.5966	Francis Schaffner	2023-10-05 18:00:00	2023-10-05 18:25:00		Larval sampling	0		Rural habitat	Human-made (artificial) container	7 vases
Poland	Lubelskie	Puławski	PL094	WR01	Wilków	Szczekarków 9	51.2441	21.8672	Wojciech Rożek	2023-10-03 15:00:00	2023-10-04 09:00:00		Black hole mosquito trap	1	Park, garden	Agriculture										5	Aedes vexans	Morphological
Poland	Lubelskie	Puławski	PL094	WR01	Wilków	Szczekarków 9	51.2441	21.8672	Wojciech Rożek	2023-10-03 15:00:00	2023-10-04 09:00:00		Black hole mosquito trap	1	Park, garden	Agriculture										12	Culex pipiens/torrentium	Morphological
Poland	Lubelskie	Puławski	PL094	WR01	Wilków	Szczekarków 9	51.2441	21.8672	Wojciech Rożek	2023-10-03 15:00:00	2023-10-04 09:00:00		Black hole mosquito trap	1	Park, garden	Agriculture										29	Anopheles plumbeus	Morphological
Poland	Lubelskie	Puławski	PL094	WR01	Wilków	Szczekarków 9	51.2441	21.8672	Wojciech Rożek	2023-10-03 15:00:00	2023-10-04 09:00:00		Black hole mosquito trap	1	Park, garden	Agriculture										2	Anopheles maculipennis s.l.	Morphological
Poland	Lubelskie	Puławski	PL094	WR02	Wilków	Szczekarków 9	51.2441	21.8672	Wojciech Rożek	2023-10-04 15:00:00	2023-10-05 09:00:00		Black hole mosquito trap	1	Park, garden	Agriculture										2	Aedes vexans	Morphological
Poland	Lubelskie	Puławski	PL094	WR02	Wilków	Szczekarków 9	51.2441	21.8672	Wojciech Rożek	2023-10-04 15:00:00	2023-10-05 09:00:00		Black hole mosquito trap	1	Park, garden	Agriculture										16	Anopheles plumbeus	Morphological
Poland	Lubelskie	Puławski	PL094	WR02	Wilków	Szczekarków 9	51.2441	21.8672	Wojciech Rożek	2023-10-04 15:00:00	2023-10-05 09:00:00		Black hole mosquito trap	1	Park, garden	Agriculture									3	19	Culex pipiens/torrentium	Morphological
Poland	Lubelskie	Puławski	PL094	WR02	Wilków	Szczekarków 9	51.2441	21.8672	Wojciech Rożek	2023-10-04 15:00:00	2023-10-05 09:00:00		Black hole mosquito trap	1	Park, garden	Agriculture									1	1	Culiseta annulata	Morphological
Poland	Lubelskie	Puławski	PL094	WR03	Wilków	Szczekarków 9	51.2441	21.8672	Wojciech Rożek	2023-10-06 15:00:00	2023-10-07 09:00:00		Black hole mosquito trap	1	Park, garden	Agriculture										8	Aedes vexans	Morphological
Poland	Lubelskie	Puławski	PL094	WR03	Wilków	Szczekarków 9	51.2441	21.8672	Wojciech Rożek	2023-10-06 15:00:00	2023-10-07 09:00:00		Black hole mosquito trap	1	Park, garden	Agriculture										12	Anopheles plumbeus	Morphological
Poland	Lubelskie	Puławski	PL094	WR03	Wilków	Szczekarków 9	51.2441	21.8672	Wojciech Rożek	2023-10-06 15:00:00	2023-10-07 09:00:00		Black hole mosquito trap	1	Park, garden	Agriculture										30	Culex pipiens/torrentium	Morphological
Poland	Lubelskie	Puławski	PL094	WR03	Wilków	Szczekarków 9	51.2441	21.8672	Wojciech Rożek	2023-10-06 15:00:00	2023-10-07 09:00:00		Black hole mosquito trap	1	Park, garden	Agriculture										1	Culiseta annulata	Morphological
Poland	Lubelskie	Puławski	PL094	WR04	Wilków	Szczekarków 9	51.2441	21.8672	Wojciech Rożek	2023-10-07 15:00:00	2023-10-08 09:00:00		Black hole mosquito trap	1	Park, garden	Agriculture										5	Aedes vexans	Morphological
Poland	Lubelskie	Puławski	PL094	WR04	Wilków	Szczekarków 9	51.2441	21.8672	Wojciech Rożek	2023-10-07 15:00:00	2023-10-08 09:00:00		Black hole mosquito trap	1	Park, garden	Agriculture										4	Anopheles plumbeus	Morphological
Poland	Lubelskie	Puławski	PL094	WR04	Wilków	Szczekarków 9	51.2441	21.8672	Wojciech Rożek	2023-10-07 15:00:00	2023-10-08 09:00:00		Black hole mosquito trap	1	Park, garden	Agriculture									2		Culex pipiens/torrentium	Morphological
Poland	Lubelskie	Puławski	PL094	WR04	Wilków	Szczekarków 9	51.2441	21.8672	Wojciech Rożek	2023-10-07 15:00:00	2023-10-08 09:00:00		Black hole mosquito trap	1	Park, garden	Agriculture									1		Culiseta annulata	Morphological
Poland	Lubelskie	Puławski	PL094	WR05	Wilków	Szczekarków 9	51.2441	21.8672	Wojciech Rożek	2023-10-08 15:00:00	2023-10-09 09:00:00		Black hole mosquito trap	1	Park, garden	Agriculture										1	Aedes vexans	Morphological
Poland	Lubelskie	Puławski	PL094	WR05	Wilków	Szczekarków 9	51.2441	21.8672	Wojciech Rożek	2023-10-08 15:00:00	2023-10-09 09:00:00		Black hole mosquito trap	1	Park, garden	Agriculture										5	Anopheles plumbeus	Morphological
Poland	Lubelskie	Puławski	PL094	WR05	Wilków	Szczekarków 9	51.2441	21.8672	Wojciech Rożek	2023-10-08 15:00:00	2023-10-09 09:00:00		Black hole mosquito trap	1	Park, garden	Agriculture									4		Culex pipiens/torrentium	Morphological
Poland	Lubelskie	Puławski	PL094	WR05	Wilków	Szczekarków 9	51.2441	21.8672	Wojciech Rożek	2023-10-08 15:00:00	2023-10-09 09:00:00		Black hole mosquito trap	1	Park, garden	Agriculture									1		Culiseta annulata	Morphological
Poland	Lubelskie	Puławski	PL094	WR06	Wilków	Szczekarków 9	51.2441	21.8672	Wojciech Rożek	2023-10-10 15:00:00	2023-10-11 09:00:00		Black hole mosquito trap	0	Park, garden	Agriculture
Poland	Lubelskie	Puławski	PL094	WR07	Wilków	Szczekarków 9	51.2441	21.8672	Wojciech Rożek	2023-10-11 15:00:00	2023-10-12 09:00:00		Black hole mosquito trap	1	Park, garden	Agriculture										2	Aedes vexans	Morphological
Poland	Lubelskie	Puławski	PL094	WR07	Wilków	Szczekarków 9	51.2441	21.8672	Wojciech Rożek	2023-10-11 15:00:00	2023-10-12 09:00:00		Black hole mosquito trap	1	Park, garden	Agriculture									4	7	Culex pipiens/torrentium	Morphological
Poland	Lubelskie	Puławski	PL094	WR07	Wilków	Szczekarków 9	51.2441	21.8672	Wojciech Rożek	2023-10-11 15:00:00	2023-10-12 09:00:00		Black hole mosquito trap	1	Park, garden	Agriculture										2	Anopheles plumbeus	Morphological
Poland	Lubelskie	Puławski	PL094	WR08	Wilków	Szczekarków 9	51.2441	21.8672	Wojciech Rożek	2023-10-12 15:00:00	2023-10-13 09:00:00		Black hole mosquito trap	0	Park, garden	Agriculture
Poland	Lubelskie	Puławski	PL094	WR09	Wilków	Szczekarków 9	51.2441	21.8672	Wojciech Rożek	2023-10-13 15:00:00	2023-10-14 09:00:00		Black hole mosquito trap	1	Park, garden	Agriculture										3	Anopheles plumbeus	Morphological
Poland	Lubelskie	Puławski	PL094	WR09	Wilków	Szczekarków 9	51.2441	21.8672	Wojciech Rożek	2023-10-13 15:00:00	2023-10-14 09:00:00		Black hole mosquito trap	1	Park, garden	Agriculture										1	Anopheles maculipennis s.l.	Morphological
Poland	Lubelskie	Puławski	PL094	WR09	Wilków	Szczekarków 9	51.2441	21.8672	Wojciech Rożek	2023-10-13 15:00:00	2023-10-14 09:00:00		Black hole mosquito trap	1	Park, garden	Agriculture									3	21	Culex pipiens/torrentium	Morphological
Poland	Lubelskie	Puławski	PL094	WR10	Wilków	Szczekarków 9	51.2441	21.8672	Wojciech Rożek	2023-10-16 15:00:00	2023-10-17 09:00:00		Black hole mosquito trap	1	Park, garden	Agriculture										13	Anopheles plumbeus	Morphological
Poland	Lubelskie	Puławski	PL094	WR10	Wilków	Szczekarków 9	51.2441	21.8672	Wojciech Rożek	2023-10-16 15:00:00	2023-10-17 09:00:00		Black hole mosquito trap	1	Park, garden	Agriculture										1	Aedes vexans	Morphological
Poland	Lubelskie	Puławski	PL094	WR10	Wilków	Szczekarków 9	51.2441	21.8672	Wojciech Rożek	2023-10-16 15:00:00	2023-10-17 09:00:00		Black hole mosquito trap	1	Park, garden	Agriculture									3	13	Culex pipiens/torrentium	Morphological
Poland	Lubelskie	Puławski	PL094	WR10	Wilków	Szczekarków 9	51.2441	21.8672	Wojciech Rożek	2023-10-16 15:00:00	2023-10-17 09:00:00		Black hole mosquito trap	1	Park, garden	Agriculture										1	Culiseta annulata	Morphological
Poland	Lubelskie	Puławski	PL094	WR11	Wilków	Szczekarków 9	51.2441	21.8672	Wojciech Rożek	2023-10-17 15:00:00	2023-10-18 09:00:00		Black hole mosquito trap	1	Park, garden	Agriculture									4	5	Culex pipiens/torrentium	Morphological
Poland	Lubelskie	Puławski	PL094	WR11	Wilków	Szczekarków 9	51.2441	21.8672	Wojciech Rożek	2023-10-17 15:00:00	2023-10-18 09:00:00		Black hole mosquito trap	1	Park, garden	Agriculture										9	Anopheles plumbeus	Morphological
Poland	Lubelskie	Puławski	PL094	WR11	Wilków	Szczekarków 9	51.2441	21.8672	Wojciech Rożek	2023-10-17 15:00:00	2023-10-18 09:00:00		Black hole mosquito trap	1	Park, garden	Agriculture									2		Culiseta annulata	Morphological
Poland	Lubelskie	Puławski	PL094	WR12	Wilków	Szczekarków 9	51.2441	21.8672	Wojciech Rożek	2023-10-18 15:00:00	2023-10-19 09:00:00		Black hole mosquito trap	1	Park, garden	Agriculture										1	Culex pipiens/torrentium	Morphological
Poland	Lubelskie	Puławski	PL094	WR13	Wilków	Szczekarków 9	51.2441	21.8672	Wojciech Rożek	2023-10-19 15:00:00	2023-10-20 09:00:00		Black hole mosquito trap	1	Park, garden	Agriculture										4	Culex pipiens/torrentium	Morphological
Poland	Lubelskie	Puławski	PL094	WR14	Wilków	Szczekarków 9	51.2441	21.8672	Wojciech Rożek	2023-10-20 15:00:00	2023-10-21 09:00:00		Black hole mosquito trap	0	Park, garden	Agriculture
Poland	Lubelskie	Puławski	PL094	WR15	Wilków	Szczekarków 9	51.2441	21.8672	Wojciech Rożek	2023-10-21 15:00:00	2023-10-22 09:00:00		Black hole mosquito trap	1	Park, garden	Agriculture									6	19	Culex pipiens/torrentium	Morphological
Poland	Lubelskie	Puławski	PL094	WR15	Wilków	Szczekarków 9	51.2441	21.8672	Wojciech Rożek	2023-10-21 15:00:00	2023-10-22 09:00:00		Black hole mosquito trap	1	Park, garden	Agriculture										5	Anopheles plumbeus	Morphological
Poland	Lubelskie	Puławski	PL094	WR16	Wilków	Szczekarków 9	51.2441	21.8672	Wojciech Rożek	2023-10-22 15:00:00	2023-10-23 09:00:00		Black hole mosquito trap	1	Park, garden	Agriculture										3	Aedes vexans	Morphological
Poland	Lubelskie	Puławski	PL094	WR16	Wilków	Szczekarków 9	51.2441	21.8672	Wojciech Rożek	2023-10-22 15:00:00	2023-10-23 09:00:00		Black hole mosquito trap	1	Park, garden	Agriculture										7	Culex pipiens/torrentium	Morphological
Poland	Lubelskie	Puławski	PL094	WR16	Wilków	Szczekarków 9	51.2441	21.8672	Wojciech Rożek	2023-10-22 15:00:00	2023-10-23 09:00:00		Black hole mosquito trap	1	Park, garden	Agriculture										3	Anopheles plumbeus	Morphological
Poland	Lubelskie	Puławski	PL094	WR17	Wilków	Szczekarków 9	51.2441	21.8672	Wojciech Rożek	2023-10-23 15:00:00	2023-10-24 09:00:00		Black hole mosquito trap	1	Park, garden	Agriculture										2	Aedes vexans	Morphological
Poland	Lubelskie	Puławski	PL094	WR17	Wilków	Szczekarków 9	51.2441	21.8672	Wojciech Rożek	2023-10-23 15:00:00	2023-10-24 09:00:00		Black hole mosquito trap	1	Park, garden	Agriculture									2	8	Culex pipiens/torrentium	Morphological
Poland	Lubelskie	Puławski	PL094	WR18	Wilków	Szczekarków 9	51.2441	21.8672	Wojciech Rożek	2023-10-24 15:00:00	2023-10-25 09:00:00		Black hole mosquito trap	1	Park, garden	Agriculture										1	Aedes vexans	Morphological
Poland	Lubelskie	Puławski	PL094	WR18	Wilków	Szczekarków 9	51.2441	21.8672	Wojciech Rożek	2023-10-24 15:00:00	2023-10-25 09:00:00		Black hole mosquito trap	1	Park, garden	Agriculture										12	Culex pipiens/torrentium	Morphological
Poland	Lubelskie	Puławski	PL094	WR19	Wilków	Szczekarków 9	51.2441	21.8672	Wojciech Rożek	2023-10-29 15:00:00	2023-10-30 09:00:00		Black hole mosquito trap	1	Park, garden	Agriculture									7	22	Culex pipiens/torrentium	Morphological
Poland	Lubelskie	Puławski	PL094	WR19	Wilków	Szczekarków 9	51.2441	21.8672	Wojciech Rożek	2023-10-29 15:00:00	2023-10-30 09:00:00		Black hole mosquito trap	1	Park, garden	Agriculture										1	Anopheles plumbeus	Morphological
Poland	Lubelskie	Puławski	PL094	WR19	Wilków	Szczekarków 9	51.2441	21.8672	Wojciech Rożek	2023-10-29 15:00:00	2023-10-30 09:00:00		Black hole mosquito trap	1	Park, garden	Agriculture										1	Culiseta annulata	Morphological
Poland	Lubelskie	Puławski	PL094	WR20	Wilków	Szczekarków 9	51.2441	21.8672	Wojciech Rożek	2023-11-05 15:00:00	2023-11-06 09:00:00		Black hole mosquito trap	1	Park, garden	Agriculture									4	10	Culex pipiens/torrentium	Morphological
Poland	Lubelskie	Puławski	PL094	WR20	Wilków	Szczekarków 9	51.2441	21.8672	Wojciech Rożek	2023-11-05 15:00:00	2023-11-06 09:00:00		Black hole mosquito trap	1	Park, garden	Agriculture										2	Culiseta annulata	Morphological
Poland	Lubelskie	Puławski	PL094	WR21	Wilków	Szczekarków 9	51.2441	21.8672	Wojciech Rożek	2023-11-06 15:00:00	2023-11-07 09:00:00		Black hole mosquito trap	1	Park, garden	Agriculture										1	Culex pipiens/torrentium	Morphological
Poland	Lubelskie	Puławski	PL094	WR21	Wilków	Szczekarków 9	51.2441	21.8672	Wojciech Rożek	2023-11-06 15:00:00	2023-11-07 09:00:00		Black hole mosquito trap	1	Park, garden	Agriculture										2	Culiseta annulata	Morphological
Poland	Lubelskie	Puławski	PL094	WR22	Wilków	Szczekarków 9	51.2441	21.8672	Wojciech Rożek	2023-11-07 15:00:00	2023-11-08 09:00:00		Black hole mosquito trap	1	Park, garden	Agriculture									3	3	Culex pipiens/torrentium	Morphological
Poland	Lubelskie	Puławski	PL094	WR22	Wilków	Szczekarków 9	51.2441	21.8672	Wojciech Rożek	2023-11-07 15:00:00	2023-11-08 09:00:00		Black hole mosquito trap	1	Park, garden	Agriculture									1		Culiseta annulata	Morphological
Poland	Lubelskie	Puławski	PL094	WR23	Wilków	Szczekarków 9	51.2441	21.8672	Wojciech Rożek	2023-11-08 15:00:00	2023-11-09 09:00:00		Black hole mosquito trap	1	Park, garden	Agriculture									1		Culex pipiens/torrentium	Morphological
Poland	Lubelskie	Puławski	PL094	WR24	Wilków	Szczekarków 9	51.2441	21.8672	Wojciech Rożek	2023-11-09 15:00:00	2023-11-10 09:00:00		Black hole mosquito trap	1	Park, garden	Agriculture									1		Culex pipiens/torrentium	Morphological
Poland	Lubelskie	Puławski	PL094	WR25	Wilków	Szczekarków 9	51.2441	21.8672	Wojciech Rożek	2023-11-15 15:00:00	2023-11-16 09:00:00		Black hole mosquito trap	1	Park, garden	Agriculture										1	Culiseta annulata	Morphological
Poland	Lubelskie	Puławski	PL094	WR25	Wilków	Szczekarków 9	51.2441	21.8672	Wojciech Rożek	2023-11-15 15:00:00	2023-11-16 09:00:00		Black hole mosquito trap	1	Park, garden	Agriculture									1		Culex pipiens/torrentium	Morphological
Poland	Lubelskie	Puławski	PL094	WR26	Wilków	Szczekarków 9	51.2441	21.8672	Wojciech Rożek	2023-11-16 15:00:00	2023-11-17 09:00:00		Black hole mosquito trap	1	Park, garden	Agriculture										1	Aedes vexans	Morphological
Poland	Lubelskie	Puławski	PL094	WR26	Wilków	Szczekarków 9	51.2441	21.8672	Wojciech Rożek	2023-11-16 15:00:00	2023-11-17 09:00:00		Black hole mosquito trap	1	Park, garden	Agriculture									1		Culex pipiens/torrentium	Morphological
Poland	Lubelskie	Puławski	PL094	WR26	Wilków	Szczekarków 9	51.2441	21.8672	Wojciech Rożek	2023-11-16 15:00:00	2023-11-17 09:00:00		Black hole mosquito trap	1	Park, garden	Agriculture										1	Culiseta annulata	Morphological
Poland	Lubelskie	Puławski	PL094	WR27	Wilków	Szczekarków 9	51.2441	21.8672	Wojciech Rożek	2023-11-17 15:00:00	2023-11-18 09:00:00		Black hole mosquito trap	0	Park, garden	Agriculture
Poland	Wielkopolskie	Miasto Poznań	PL095	PL095	Strzeszyn		52.4565	16.8523	Łukasz Myczko	2023-10-12 12:00:00	2023-10-12 12:10:00		Larval sampling	1		Suburban habitat	Human-made (artificial) container	5 large tyres	25 l/l	20	L3-4		20			4	Culiseta annulata	Morphological
Poland	Wielkopolskie	Miasto Poznań	PL095	PL095	Strzeszyn		52.4565	16.8523	Łukasz Myczko	2023-10-12 12:00:00	2023-10-12 12:10:00		Larval sampling	1		Suburban habitat	Human-made (artificial) container	5 large tyres	25 l/l	80	L3-4		80			13	Culex pipiens/torrentium	Morphological
Slovakia	Stredné Slovensko	Žilinský kraj	SK001	SK/23/01	Makov	E442, Cemetery	49.3701	18.4845	Francis Schaffner	2023-06-25 17:30:00	2023-06-25 17:45:00		Larval sampling	1		Suburban habitat	Human-made (artificial) container	7 vases, 1 bucket	100 l/l	100	L3-4		50				Culex pipiens/torrentium	Morphological
																						80	2192	213	167	582
																						780	2192	213	167	582	all mosq
																									109	133	from LS
																									58	449	other source
																									167	582	tot

## Sheet: ESM
Supplementary online material of the Journal of the European Mosquito Control Association
DOI: https://doi.org/10.52004/2054930X-20241010
A survey targeting exotic Aedes mosquito species in Central Europe, summer 2023, reveals the extensive occurrence of Aedes japonicus in Poland
F. Schaffner, M. Kwaśnik, Ł. Myczko, W. Rożek, R. Eritja, S. Lippert, A. Weigand, D. Werner, H. Kampen, I. Rudolf, S. Šikutová, V. Čabanová, G.R.W. Wint and J. Leszczyńska
