# Supplementary material
Source: publisher figshare collection journal article supplement (https://brill.figshare.com/articles/dataset/_/26236307)
Supplement: Supplementary file 1 [file 1]

Supplementary online material of the Journal of the European Mosquito Control Association  
DOI: <https://doi.org/10.52004/2054930X-20241010>

**A survey targeting exotic *Aedes* mosquito species in Central Europe, summer 2023, reveals the extensive occurrence of *Aedes japonicus* in Poland**

*F. Schaffner, M. Kwaśnik, Ł. Myczko, W. Rożek, R. Eritja, S. Lippert, A. Weigand, D. Werner, H. Kampen, I. Rudolf, S. Šikutová, V. Čabanová, G.R.W. Wint and J. Leszczyńska*

**Figure S1.** Photo posted on iNaturalist platform on 02/01/2022 and taken at Bytom, 13/10/2021, with mosquito adult female identified as *Aedes japonicus/koreicus*. Photo source: iNaturalist, Adrian Tync, <https://creativecommons.org/licenses/by/4.0/>, modified.

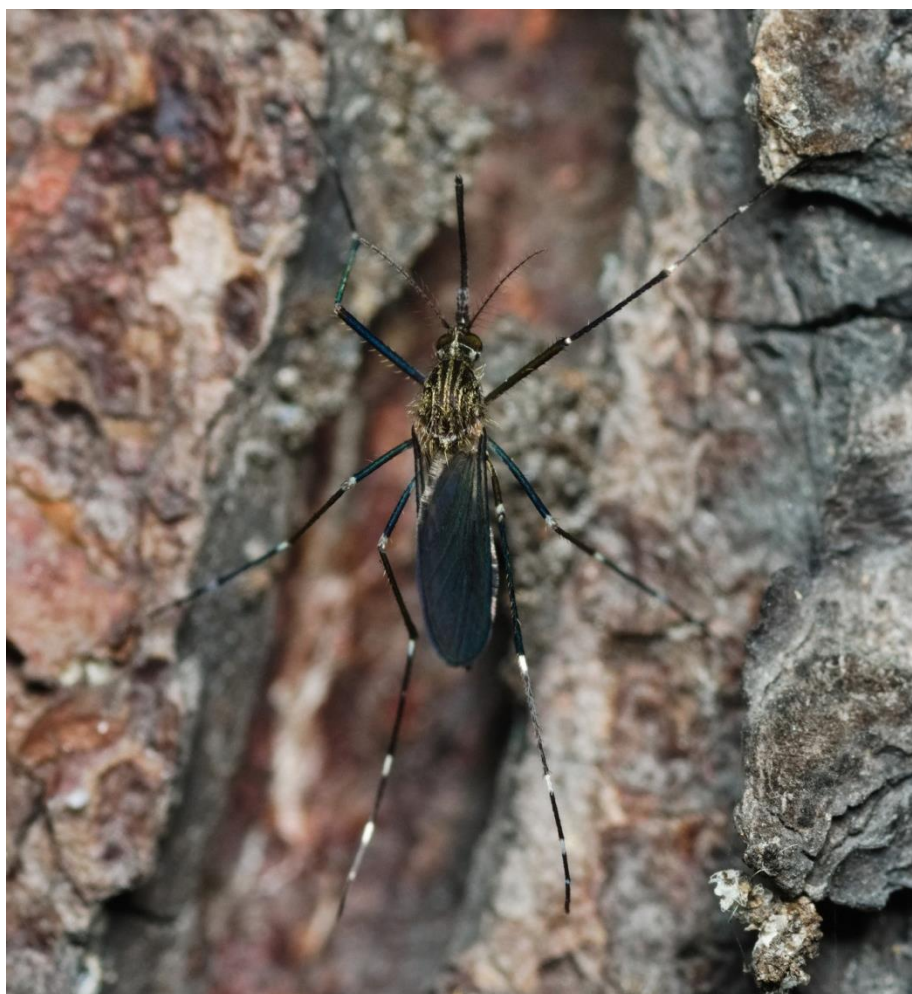

**Table S1.** List of *Anopheles* specimens with ITS2 sequences deposited to GenBank and results of molecular taxonomic assignment, collection site and date. F: Adult female; L: Larva; all obtained from larval sampling.

| Molecular assignment               | Collection site, locality and NUTS3 | Stage | Collection date | GenBank accession number |
|------------------------------------|-------------------------------------|-------|-----------------|--------------------------|
| <i>Anopheles claviger s.s.</i>     | PL007, Pilce, Wałbrzyski            | L4    | 21/06/2023      | PP898970                 |
| <i>Anopheles claviger s.s.</i>     | PL061, Biłgoraj, Chełmsko-zamojski  | F     | 02/10/2023      | PP898977                 |
| <i>Anopheles daciae</i>            | PL050.1, Stadła, Nowosądecki        | F     | 01/10/2023      | PP898974                 |
| <i>Anopheles maculipennis s.s.</i> | PL035, Łódź, Miasto Łódź            | L4    | 27/09/2023      | PP898972                 |
| <i>Anopheles maculipennis s.s.</i> | PL050.2, Stadła, Nowosądecki        | L3    | 01/10/2023      | PP898975                 |
| <i>Anopheles maculipennis s.s.</i> | PL051, Trzcínica, Krośńieński       | L4    | 01/10/2023      | PP898976                 |
| <i>Anopheles maculipennis s.s.</i> | PL089, Równa, Legnicko-głogowski    | L4    | 05/10/2023      | PP898978                 |
| <i>Anopheles messeae</i>           | PL030, Swietoszowka, Bielski        | L3    | 25/06/2023      | PP898971                 |
| <i>Anopheles petragani</i>         | PL043, Kielce, Kielecki             | L3    | 30/09/2023      | PP898973                 |

**Table S2.** Data from Mosquito Alert (MA) reports and species diagnostics for Poland, 2023. Reports #1–4 had 3 photos each; here we show one for each report. Photos source: Mosquito Alert © Creative Commons CC-BY, modified.

| Report #1          |                                            |    |
|--------------------|--------------------------------------------|--------------------------------------------------------------------------------------|
| Report MA ID       | 6N8O                                       |                                                                                      |
| Date and time      | 22.08.2023                                 |                                                                                      |
| Geo coordinates    | 20.111105 E, 49.876650 N                   |                                                                                      |
| Species diagnostic | Consensus: Probably <i>Aedes japonicus</i> |                                                                                      |
| Report #2          |                                            |   |
| Report MA ID       | 977                                        |                                                                                      |
| Date and time      | 19.10.2023                                 |                                                                                      |
| Geo coordinates    | 20.110980 E , 49.876589 N                  |                                                                                      |
| Species diagnostic | Consensus: Probably <i>Aedes japonicus</i> |                                                                                      |
| Report #3          |                                            |  |
| Report MA ID       | jyW1                                       |                                                                                      |
| Date and time      | 06.10.2023                                 |                                                                                      |
| Geo coordinates    | 20.110888 E, 49.877021 N                   |                                                                                      |
| Species diagnostic | Consensus: Probably <i>Aedes japonicus</i> |                                                                                      |

| Report #4          |                                            |   |
|--------------------|--------------------------------------------|-------------------------------------------------------------------------------------|
| Report MA ID       | Ycat                                       |                                                                                     |
| Date and time      | 09.10.2023                                 |                                                                                     |
| Geo coordinates    | 20.110890 E, 49.877016 N                   |                                                                                     |
| Species diagnostic | Consensus: Probably <i>Aedes japonicus</i> |                                                                                     |
| Report #5          |                                            |  |
| Report MA ID       | 1380                                       |                                                                                     |
| Date and time      | 04.11.2023                                 |                                                                                     |
| Geo coordinates    | 21.785679 E 49.632202 N                    |                                                                                     |
| Species diagnostic | Consensus: <i>Culiseta annulata</i>        |                                                                                     |

**Table S3.** Detailed sampling effort per admin units in our snapshot mosquito field study in Central Europe, 2023.

| Countries (in grey) and admin units NUTS3 | Number of locations | Number of samples | Number of negative immature samplings | Number of positive immature samplings | Number of human landing catches | Number of resting catches | Number of adult trappings |
|-------------------------------------------|---------------------|-------------------|---------------------------------------|---------------------------------------|---------------------------------|---------------------------|---------------------------|
| <b>Czech Republic</b>                     | <b>5</b>            | <b>5</b>          | <b>2</b>                              | <b>3</b>                              |                                 |                           |                           |
| <b>Moravskoslezsko</b>                    |                     |                   |                                       |                                       |                                 |                           |                           |
| Karlovarský kraj                          | 1                   | 1                 | 1                                     | -                                     | -                               | -                         | -                         |
| Moravskoslezský kraj                      | 1                   | 1                 | -                                     | 1                                     | -                               | -                         | -                         |
| <b>Severozápad</b>                        |                     |                   |                                       |                                       |                                 |                           |                           |
| Ústecký kraj                              | 3                   | 3                 | 1                                     | 2                                     | -                               | -                         | -                         |
| <b>Germany</b>                            | <b>9</b>            | <b>10</b>         | <b>1</b>                              | <b>9</b>                              |                                 |                           |                           |
| <b>Dresden</b>                            |                     |                   |                                       |                                       |                                 |                           |                           |
| Dresden, Kreisfreie Stadt                 | 1                   | 2                 | -                                     | 2                                     | -                               | -                         | -                         |
| Görlitz                                   | 2                   | 2                 | -                                     | 2                                     | -                               | -                         | -                         |
| Sächsische Schweiz-Osterzgebirge          | 4                   | 4                 | -                                     | 4                                     | -                               | -                         | -                         |
| <b>Oberfranken</b>                        |                     |                   |                                       |                                       |                                 |                           |                           |
| Wunsiedel i. Fichtelgebirge               | 2                   | 2                 | 1                                     | 1                                     | -                               | -                         | -                         |
| <b>Poland</b>                             | <b>96</b>           | <b>118</b>        | <b>16</b>                             | <b>82</b>                             | <b>13</b>                       | <b>2</b>                  | <b>33</b>                 |
| <b>Dolnośląskie</b>                       |                     |                   |                                       |                                       |                                 |                           |                           |
| Jeleniogórski                             | 5                   | 7                 | -                                     | 6                                     | 1                               | -                         | -                         |
| Legnicko-głogowski                        | 5                   | 6                 | 1                                     | 3                                     | 1                               | 1                         | -                         |
| Wałbrzyski                                | 4                   | 4                 | 1                                     | 3                                     | -                               | -                         | -                         |
| Wrocławski                                | 1                   | 1                 | -                                     | 1                                     | -                               | -                         | -                         |
| <b>Łódzkie</b>                            |                     |                   |                                       |                                       |                                 |                           |                           |
| Łódzki                                    | 1                   | 1                 | -                                     | 1                                     | -                               | -                         | -                         |
| Piotrkowski                               | 3                   | 2                 | -                                     | 1                                     | 1                               | -                         | -                         |
| Sieradzki                                 | 4                   | 4                 | 1                                     | 3                                     | -                               | -                         | -                         |
| Skierniewicki                             | 3                   | 5                 | 3                                     | 2                                     | -                               | -                         | -                         |
| <b>Lubelskie</b>                          |                     |                   |                                       |                                       |                                 |                           |                           |
| Chełmsko-zamojski                         | 2                   | 2                 | -                                     | 2                                     | -                               | -                         | -                         |
| Lubelski                                  | 4                   | 4                 | 1                                     | 3                                     | -                               | -                         | -                         |
| Puławski                                  | 4                   | 30                | 1                                     | 2                                     | -                               | -                         | 27                        |
| <b>Lubuskie</b>                           |                     |                   |                                       |                                       |                                 |                           |                           |
| Zielonogórski                             | 2                   | 2                 | 2                                     | -                                     | -                               | -                         | -                         |
| <b>Małopolskie</b>                        |                     |                   |                                       |                                       |                                 |                           |                           |
| Krakowski                                 | 1                   | 1                 | -                                     | 1                                     | -                               | -                         | -                         |
| Miasto Kraków                             | 1                   | 1                 | -                                     | 1                                     | -                               | -                         | -                         |
| Nowosądecki                               | 2                   | 3                 | -                                     | 3                                     | -                               | -                         | -                         |
| Nowotarski                                | 1                   | 1                 | -                                     | 1                                     | -                               | -                         | -                         |
| Oświęcimski                               | 1                   | 1                 | -                                     | 1                                     | -                               | -                         | -                         |
| Tarnowski                                 | 2                   | 2                 | -                                     | 2                                     | -                               | -                         | -                         |

|                              |            |            |           |           |           |          |           |
|------------------------------|------------|------------|-----------|-----------|-----------|----------|-----------|
| <b>Mazowiecki regionalny</b> |            |            |           |           |           |          |           |
| Radomski                     | 3          | 5          | -         | 4         | 1         | -        | -         |
| Żyrardowski                  | 2          | 2          | 1         | 1         | -         | -        | -         |
| <b>Miasto Łódź</b>           |            |            |           |           |           |          |           |
| Miasto Łódź                  | 5          | 12         | -         | 4         | 2         | -        | 6         |
| <b>Opolskie</b>              |            |            |           |           |           |          |           |
| Nyski                        | 1          | 1          | -         | 1         | -         | -        | -         |
| Opolski                      | 2          | 3          | -         | 1         | 1         | 1        | -         |
| <b>Podkarpackie</b>          |            |            |           |           |           |          |           |
| Krośnieński                  | 2          | 3          | -         | 3         | -         | -        | -         |
| Przemyski                    | 3          | 5          | -         | 5         | -         | -        | -         |
| Rzeszowski                   | 1          | 1          | -         | 1         | -         | -        | -         |
| Tarnobrzewski                | 4          | 5          | 1         | 4         | -         | -        | -         |
| <b>Śląskie</b>               |            |            |           |           |           |          |           |
| Bielski                      | 2          | 2          | -         | 2         | -         | -        | -         |
| Bytomski                     | 2          | 2          | -         | 2         | -         | -        | -         |
| Częstochowski                | 3          | 5          | -         | 3         | 2         | -        | -         |
| Gliwicki                     | 1          | 1          | -         | 1         | -         | -        | -         |
| Katowicki                    | 1          | 1          | -         | 1         | -         | -        | -         |
| Rybnicki                     | 3          | 5          | 1         | 3         | 1         | -        | -         |
| Sosnowiecki                  | 4          | 4          | -         | 2         | 2         | -        | -         |
| <b>Świętokrzyskie</b>        |            |            |           |           |           |          |           |
| Kielecki                     | 1          | 2          | -         | 2         | -         | -        | -         |
| Sandomiersko-jędrzejowski    | 3          | 3          | -         | 2         | 1         | -        | -         |
| <b>Wielkopolskie</b>         |            |            |           |           |           |          |           |
| Kaliski                      | 3          | 3          | 3         | -         | -         | -        | -         |
| Leszczyński                  | 3          | 3          | -         | 3         | -         | -        | -         |
| Miasto Poznań                | 1          | 1          |           | 1         |           |          |           |
| <b>Slovakia</b>              |            |            |           |           |           |          |           |
|                              | 1          | 1          |           | 1         |           |          |           |
| <b>Stredné Slovensko</b>     |            |            |           |           |           |          |           |
| Žilinský kraj                | 1          | 1          | -         | 1         | -         | -        | -         |
| <b>Grand Total</b>           | <b>111</b> | <b>162</b> | <b>19</b> | <b>95</b> | <b>13</b> | <b>2</b> | <b>33</b> |

**Table S4.** Number of locations positive for a mosquito species per admin unit in our snapshot mosquito field study in Central Europe, 2023.

| Countries (grey), admin units NUTS2 (bold) and NUTS3 | <i>Aedes (Aedes) cinereus/geminus</i> | <i>Aedes (Aed.) geminus</i> | <i>Aedes (Aedimorphus) vexans</i> | <i>Aedes (Dahlia) geniculatus</i> | <i>Aedes (Hulecoeteomyia) japonicus</i> | <i>Aedes (Ochlerotatus) annulipes/cantans</i> | <i>Aedes (Och.) sticticus</i> | <i>Anopheles (Anopheles) claviger s.s.</i> | <i>Anopheles (Ano.) daciae</i> | <i>Anopheles (Ano.) messeae</i> | <i>Anopheles (Ano.) maculipennis s.l.</i> | <i>Anopheles (Ano.) maculipennis s.s.</i> | <i>Anopheles (Ano.) petragani</i> | <i>Anopheles (Ano.) plumbeus</i> | <i>Coquillettidia (Coquillettidia) richiardii</i> | <i>Culex (Culex) pipiens</i> | <i>Culex (Cux.) pipiens/torrentium</i> | <i>Culex (Cux.) torrentium</i> | <i>Culex (Maillotia) hortensis</i> | <i>Culex (Neoculex) territans</i> | <i>Culiseta (Culiseta) annulata</i> | <i>Culiseta (Cus.) glaphyoptera</i> | Number of observed taxa |
|------------------------------------------------------|---------------------------------------|-----------------------------|-----------------------------------|-----------------------------------|-----------------------------------------|-----------------------------------------------|-------------------------------|--------------------------------------------|--------------------------------|---------------------------------|-------------------------------------------|-------------------------------------------|-----------------------------------|----------------------------------|---------------------------------------------------|------------------------------|----------------------------------------|--------------------------------|------------------------------------|-----------------------------------|-------------------------------------|-------------------------------------|-------------------------|
| <b>Czech Republic</b>                                | -                                     | -                           | -                                 | 1                                 | 2                                       | -                                             | -                             | -                                          | -                              | -                               | -                                         | -                                         | -                                 | -                                | -                                                 | -                            | -                                      | -                              | -                                  | -                                 | -                                   | -                                   | 2                       |
| <b>Moravskoslezsko</b>                               |                                       |                             |                                   |                                   |                                         |                                               |                               |                                            |                                |                                 |                                           |                                           |                                   |                                  |                                                   |                              |                                        |                                |                                    |                                   |                                     |                                     |                         |
| Moravskoslezský kraj                                 | -                                     | -                           | -                                 | -                                 | 1                                       | -                                             | -                             | -                                          | -                              | -                               | -                                         | -                                         | -                                 | -                                | -                                                 | -                            | -                                      | -                              | -                                  | -                                 | -                                   | -                                   | 1                       |
| <b>Severozápad</b>                                   |                                       |                             |                                   |                                   |                                         |                                               |                               |                                            |                                |                                 |                                           |                                           |                                   |                                  |                                                   |                              |                                        |                                |                                    |                                   |                                     |                                     |                         |
| Ústecký kraj                                         | -                                     | -                           | -                                 | 1                                 | 1                                       | -                                             | -                             | -                                          | -                              | -                               | -                                         | -                                         | -                                 | -                                | -                                                 | -                            | -                                      | -                              | -                                  | -                                 | -                                   | -                                   | 2                       |
| <b>Germany</b>                                       | -                                     | -                           | -                                 | 2                                 | 1                                       | -                                             | -                             | -                                          | -                              | -                               | -                                         | -                                         | -                                 | 2                                | -                                                 | 1                            | 5                                      | 3                              | -                                  | -                                 | 1                                   | -                                   | 7                       |
| <b>Dresden</b>                                       |                                       |                             |                                   |                                   |                                         |                                               |                               |                                            |                                |                                 |                                           |                                           |                                   |                                  |                                                   |                              |                                        |                                |                                    |                                   |                                     |                                     |                         |
| Dresden, Kreisfreie Stadt                            | -                                     | -                           | -                                 | 1                                 | 1                                       | -                                             | -                             | -                                          | -                              | -                               | -                                         | -                                         | -                                 | 1                                | -                                                 | -                            | 1                                      | -                              | -                                  | -                                 | -                                   | -                                   | 4                       |
| Görlitz                                              | -                                     | -                           | -                                 | 1                                 | -                                       | -                                             | -                             | -                                          | -                              | -                               | -                                         | -                                         | -                                 | -                                | -                                                 | -                            | 1                                      | 1                              | -                                  | -                                 | -                                   | -                                   | 3                       |
| Sächsische Schweiz-Osterzgebirge                     | -                                     | -                           | -                                 | -                                 | -                                       | -                                             | -                             | -                                          | -                              | -                               | -                                         | -                                         | -                                 | 1                                | -                                                 | 1                            | 3                                      | 1                              | -                                  | -                                 | -                                   | -                                   | 4                       |
| <b>Oberfranken</b>                                   |                                       |                             |                                   |                                   |                                         |                                               |                               |                                            |                                |                                 |                                           |                                           |                                   |                                  |                                                   |                              |                                        |                                |                                    |                                   |                                     |                                     |                         |
| Wunsiedel i. Fichtelgebirge                          | -                                     | -                           | -                                 | -                                 | -                                       | -                                             | -                             | -                                          | -                              | -                               | -                                         | -                                         | -                                 | -                                | -                                                 | -                            | -                                      | 1                              | -                                  | -                                 | 1                                   | -                                   | 2                       |
| <b>Poland</b>                                        | 7                                     | 1                           | 7                                 | 10                                | 21                                      | 7                                             | 6                             | 11                                         | 1                              | 1                               | 1                                         | 4                                         | 1                                 | 16                               | 2                                                 | 23                           | 36                                     | 2                              | 1                                  | 4                                 | 11                                  | 1                                   | 22                      |
| <b>Dolnośląskie</b>                                  |                                       |                             |                                   |                                   |                                         |                                               |                               |                                            |                                |                                 |                                           |                                           |                                   |                                  |                                                   |                              |                                        |                                |                                    |                                   |                                     |                                     |                         |
| Jeleniogórski                                        | -                                     | -                           | -                                 | 2                                 | -                                       | -                                             | -                             | 1                                          | -                              | -                               | -                                         | -                                         | -                                 | 3                                | -                                                 | 2                            | 3                                      | -                              | -                                  | -                                 | -                                   | 1                                   | 6                       |
| Legnicko-głogowski                                   | -                                     | -                           | 1                                 | -                                 | -                                       | -                                             | -                             | -                                          | -                              | -                               | -                                         | 1                                         | -                                 | -                                | -                                                 | 2                            | 1                                      | -                              | -                                  | 1                                 | -                                   | -                                   | 5                       |
| Wałbrzyski                                           | -                                     | -                           | -                                 | 2                                 | 1                                       | -                                             | -                             | 1                                          | -                              | -                               | -                                         | -                                         | -                                 | 1                                | -                                                 | -                            | -                                      | -                              | -                                  | -                                 | -                                   | -                                   | 4                       |
| Wrocławski                                           | -                                     | -                           | -                                 | -                                 | 1                                       | -                                             | -                             | 1                                          | -                              | -                               | -                                         | -                                         | -                                 | 1                                | -                                                 | -                            | 1                                      | -                              | -                                  | -                                 | -                                   | -                                   | 4                       |
| <b>Łódzkie</b>                                       |                                       |                             |                                   |                                   |                                         |                                               |                               |                                            |                                |                                 |                                           |                                           |                                   |                                  |                                                   |                              |                                        |                                |                                    |                                   |                                     |                                     |                         |
| Łódzki                                               | -                                     | -                           | -                                 | -                                 | 1                                       | -                                             | -                             | -                                          | -                              | -                               | -                                         | -                                         | -                                 | -                                | -                                                 | 1                            | -                                      | -                              | -                                  | -                                 | -                                   | -                                   | 2                       |
| Piotrkowski                                          | 2                                     | -                           | 2                                 | -                                 | -                                       | 1                                             | -                             | 1                                          | -                              | -                               | -                                         | -                                         | -                                 | -                                | -                                                 | 1                            | -                                      | -                              | -                                  | -                                 | 1                                   | -                                   | 6                       |
| Sieradzki                                            | -                                     | -                           | -                                 | -                                 | -                                       | -                                             | -                             | 1                                          | -                              | -                               | -                                         | -                                         | -                                 | -                                | -                                                 | -                            | 2                                      | -                              | -                                  | -                                 | -                                   | -                                   | 2                       |
| Skierniewicki                                        | -                                     | -                           | -                                 | -                                 | -                                       | -                                             | -                             | -                                          | -                              | -                               | -                                         | -                                         | -                                 | -                                | -                                                 | 1                            | 1                                      | -                              | -                                  | -                                 | -                                   | -                                   | 2                       |
| <b>Lubelskie</b>                                     |                                       |                             |                                   |                                   |                                         |                                               |                               |                                            |                                |                                 |                                           |                                           |                                   |                                  |                                                   |                              |                                        |                                |                                    |                                   |                                     |                                     |                         |
| Chełmsko-zamojski                                    | -                                     | -                           | -                                 | -                                 | -                                       | -                                             | -                             | 1                                          | -                              | -                               | -                                         | -                                         | -                                 | -                                | -                                                 | -                            | 2                                      | -                              | -                                  | 1                                 | -                                   | -                                   | 3                       |
| Lubelski                                             | -                                     | -                           | -                                 | -                                 | -                                       | -                                             | 1                             | 1                                          | -                              | -                               | -                                         | -                                         | -                                 | -                                | -                                                 | -                            | 3                                      | -                              | -                                  | -                                 | 1                                   | -                                   | 4                       |
| Puławski                                             | -                                     | -                           | 1                                 | -                                 | -                                       | -                                             | -                             | -                                          | -                              | -                               | 1                                         | -                                         | -                                 | 1                                | -                                                 | 1                            | 1                                      | -                              | -                                  | -                                 | 1                                   | -                                   | 6                       |
| <b>Małopolskie</b>                                   |                                       |                             |                                   |                                   |                                         |                                               |                               |                                            |                                |                                 |                                           |                                           |                                   |                                  |                                                   |                              |                                        |                                |                                    |                                   |                                     |                                     |                         |
| Krakowski                                            | -                                     | -                           | -                                 | 1                                 | 1                                       | -                                             | -                             | -                                          | -                              | -                               | -                                         | -                                         | -                                 | -                                | -                                                 | -                            | -                                      | -                              | -                                  | -                                 | -                                   | -                                   | 2                       |
| Miasto Kraków                                        | -                                     | -                           | -                                 | -                                 | -                                       | -                                             | -                             | -                                          | -                              | -                               | -                                         | -                                         | -                                 | -                                | -                                                 | 1                            | -                                      | 1                              | -                                  | -                                 | -                                   | -                                   | 2                       |
| Nowosądecki                                          | -                                     | 1                           | 1                                 | -                                 | 1                                       | -                                             | -                             | 2                                          | 1                              | -                               | -                                         | 1                                         | -                                 | 1                                | -                                                 | -                            | -                                      | -                              | -                                  | -                                 | -                                   | -                                   | 6                       |
| Nowotarski                                           | -                                     | -                           | -                                 | -                                 | 1                                       | -                                             | -                             | -                                          | -                              | -                               | -                                         | -                                         | -                                 | -                                | -                                                 | -                            | -                                      | -                              | -                                  | -                                 | -                                   | -                                   | 1                       |
| Oświęcimski                                          | -                                     | -                           | -                                 | -                                 | 1                                       | -                                             | -                             | -                                          | -                              | -                               | -                                         | -                                         | -                                 | 1                                | -                                                 | -                            | -                                      | -                              | -                                  | -                                 | -                                   | -                                   | 2                       |

|                                          |          |          |          |           |           |          |          |           |          |          |          |          |          |           |          |           |           |          |          |          |           |          |           |
|------------------------------------------|----------|----------|----------|-----------|-----------|----------|----------|-----------|----------|----------|----------|----------|----------|-----------|----------|-----------|-----------|----------|----------|----------|-----------|----------|-----------|
| Tarnowski                                | 1        | -        | -        | -         | 1         | -        | -        | 1         | -        | -        | -        | -        | -        | -         | -        | 1         | 1         | -        | -        | -        | 1         | -        | 6         |
| <b>Mazowiecki regionalny</b>             |          |          |          |           |           |          |          |           |          |          |          |          |          |           |          |           |           |          |          |          |           |          |           |
| Radomski                                 | -        | -        | -        | 2         | -         | -        | -        | -         | -        | -        | -        | -        | -        | 1         | -        | 1         | 2         | -        | 1        | -        | 1         | -        | 6         |
| Żyrardowski                              | -        | -        | -        | -         | -         | -        | -        | -         | -        | -        | -        | -        | -        | -         | -        | -         | 1         | -        | -        | -        | -         | -        | 1         |
| <b>Miasto Łódź</b>                       |          |          |          |           |           |          |          |           |          |          |          |          |          |           |          |           |           |          |          |          |           |          |           |
| Miasto Łódź                              | -        | -        | 1        | -         | 1         | -        | -        | -         | -        | -        | -        | 1        | -        | 1         | -        | 4         | 2         | -        | -        | 1        | 2         | -        | 8         |
| <b>Opolskie</b>                          |          |          |          |           |           |          |          |           |          |          |          |          |          |           |          |           |           |          |          |          |           |          |           |
| Nyski                                    | -        | -        | -        | 1         | 1         | -        | -        | -         | -        | -        | -        | -        | -        | 1         | -        | 1         | -         | 1        | -        | -        | -         | -        | 5         |
| Opolski                                  | -        | -        | -        | 1         | 1         | -        | 1        | -         | -        | -        | -        | -        | -        | -         | -        | 2         | -         | -        | -        | -        | 1         | -        | 5         |
| <b>Podkarpackie</b>                      |          |          |          |           |           |          |          |           |          |          |          |          |          |           |          |           |           |          |          |          |           |          |           |
| Krośnieński                              | -        | -        | -        | -         | 1         | -        | -        | -         | -        | -        | -        | 1        | -        | -         | -        | 2         | -         | -        | -        | -        | -         | -        | 3         |
| Przemyski                                | -        | -        | -        | -         | -         | -        | -        | -         | -        | -        | -        | -        | -        | 1         | -        | 1         | 3         | -        | -        | -        | -         | -        | 3         |
| Rzeszowski                               | -        | -        | -        | -         | 1         | -        | -        | -         | -        | -        | -        | -        | -        | -         | -        | -         | -         | -        | -        | -        | -         | -        | 1         |
| Tarnobrzski                              | -        | -        | -        | -         | -         | -        | -        | -         | -        | -        | -        | -        | -        | 2         | -        | -         | 2         | -        | -        | -        | 1         | -        | 3         |
| <b>Śląskie</b>                           |          |          |          |           |           |          |          |           |          |          |          |          |          |           |          |           |           |          |          |          |           |          |           |
| Bielski                                  | -        | -        | -        | -         | 1         | -        | -        | -         | -        | 1        | -        | -        | -        | -         | -        | -         | -         | -        | -        | 1        | -         | -        | 3         |
| Bytomski                                 | -        | -        | -        | -         | 1         | -        | -        | -         | -        | -        | -        | -        | -        | -         | -        | -         | 2         | -        | -        | -        | -         | -        | 2         |
| Częstochowski                            | 2        | -        | -        | -         | -         | 2        | 1        | -         | -        | -        | -        | -        | -        | -         | -        | -         | 3         | -        | -        | -        | -         | -        | 4         |
| Gliwicki                                 | -        | -        | -        | -         | 1         | -        | -        | -         | -        | -        | -        | -        | -        | -         | -        | -         | -         | -        | -        | -        | -         | -        | 1         |
| Katowicki                                | -        | -        | -        | -         | 1         | -        | -        | -         | -        | -        | -        | -        | -        | 1         | -        | -         | -         | -        | -        | -        | -         | -        | 2         |
| Rybnicki                                 | -        | -        | -        | 1         | 1         | 1        | -        | 1         | -        | -        | -        | -        | -        | -         | -        | -         | 1         | -        | -        | -        | -         | -        | 5         |
| Sosnowiecki                              | 2        | -        | 1        | -         | 1         | 2        | 3        | -         | -        | -        | -        | -        | -        | 1         | 2        | -         | -         | -        | -        | -        | -         | -        | 7         |
| <b>Świętokrzyskie</b>                    |          |          |          |           |           |          |          |           |          |          |          |          |          |           |          |           |           |          |          |          |           |          |           |
| Kielecki                                 | -        | -        | -        | -         | 1         | -        | -        | -         | -        | -        | -        | -        | 1        | -         | -        | 1         | 1         | -        | -        | -        | -         | -        | 4         |
| Sandomiersko-jędrzejowski                | -        | -        | -        | -         | 1         | 1        | -        | -         | -        | -        | -        | -        | -        | -         | -        | 1         | -         | -        | -        | -        | -         | -        | 3         |
| <b>Wielkopolskie</b>                     |          |          |          |           |           |          |          |           |          |          |          |          |          |           |          |           |           |          |          |          |           |          |           |
| Leszczyński                              | -        | -        | -        | -         | -         | -        | -        | -         | -        | -        | -        | -        | -        | -         | -        | -         | 3         | -        | -        | -        | 1         | -        | 2         |
| Miasto Poznań                            | -        | -        | -        | -         | -         | -        | -        | -         | -        | -        | -        | -        | -        | -         | -        | -         | 1         | -        | -        | -        | 1         | -        | 2         |
| <b>Slovakia</b>                          |          |          |          |           |           |          |          |           |          |          |          |          |          |           |          |           |           |          |          |          |           |          |           |
| <b>Stredné Slovensko</b>                 |          |          |          |           |           |          |          |           |          |          |          |          |          |           |          |           |           |          |          |          |           |          |           |
| Žilinský kraj                            | -        | -        | -        | -         | -         | -        | -        | -         | -        | -        | -        | -        | -        | -         | -        | -         | 1         | -        | -        | -        | -         | -        | 1         |
| <b>Total number of sites per species</b> | <b>7</b> | <b>1</b> | <b>7</b> | <b>13</b> | <b>24</b> | <b>7</b> | <b>6</b> | <b>11</b> | <b>1</b> | <b>1</b> | <b>1</b> | <b>4</b> | <b>1</b> | <b>18</b> | <b>2</b> | <b>24</b> | <b>42</b> | <b>5</b> | <b>1</b> | <b>4</b> | <b>12</b> | <b>1</b> | <b>22</b> |

NUTS2: government regions (Regierungsbezirke) or equivalent in Germany; cohesion region (region soudržnosti) in Czech Republic; regions/Voivodeship (province) in Poland, with one exception (Mazovian Voivodeship) which is split into two NUTS2 units; oblasti (oblasti) in Slovakia.

NUTS3: districts (Kreise) in Germany; region (kraj) in Czech Republic; subregions in Poland; regions (kraje) in Slovakia.



**Table S5.** Number of species/NUTS3 combinations in our snapshot mosquito field study in Central Europe, 2023.

|                                                           | Czech<br>Republic | Germany   | Poland     | Slovakia | Total      |
|-----------------------------------------------------------|-------------------|-----------|------------|----------|------------|
| <i>Aedes (Aedes) cinereus/geminus</i>                     |                   |           | 4          |          | 4          |
| <i>Aedes (Aed.) geminus</i>                               |                   |           | 1          |          | 1          |
| <i>Aedes (Aedimorphus) vexans*</i>                        |                   |           | 6          |          | 6          |
| <i>Aedes (Dahlia) geniculatus</i>                         | 1                 | 2         | 7          |          | 10         |
| <i>Aedes (Hulecoeteomyia) japonicus*</i>                  | 2                 | 1         | 21         |          | 24         |
| <i>Aedes (Ochlerotatus) annulipes/cantans</i>             |                   |           | 5          |          | 5          |
| <i>Aedes (Och.) sticticus</i>                             |                   |           | 4          |          | 4          |
| <i>Anopheles (Anopheles) claviger s.s.*</i>               |                   |           | 10         |          | 10         |
| <i>Anopheles (Ano.) daciae</i>                            |                   |           | 1          |          | 1          |
| <i>Anopheles (Ano.) maculipennis s.l.*</i>                |                   |           | 1          |          | 1          |
| <i>Anopheles (Ano.) maculipennis s.s.*</i>                |                   |           | 4          |          | 4          |
| <i>Anopheles (Ano.) messeae*</i>                          |                   |           | 1          |          | 1          |
| <i>Anopheles (Ano.) petragani</i>                         |                   |           | 1          |          | 1          |
| <i>Anopheles (Ano.) plumbeus*</i>                         |                   | 2         | 13         |          | 15         |
| <i>Coquillettidia (Coquillettidia) richiardii*</i>        |                   |           | 1          |          | 1          |
| <i>Culex (Culex) pipiens*</i>                             |                   | 1         | 16         |          | 17         |
| <i>Culex (Cux.) pipiens/torrentium*</i>                   |                   | 3         | 20         | 1        | 24         |
| <i>Culex (Cux.) torrentium*</i>                           |                   | 3         | 2          |          | 5          |
| <i>Culex (Maillotia) hortensis</i>                        |                   |           | 1          |          | 1          |
| <i>Culex (Neoculex) territans</i>                         |                   |           | 4          |          | 4          |
| <i>Culiseta (Culiseta) annulata*</i>                      |                   | 1         | 10         |          | 11         |
| <i>Culiseta (Cus.) glaphyoptera</i>                       |                   |           | 1          |          | 1          |
| <b>Total</b>                                              | <b>3</b>          | <b>13</b> | <b>134</b> | <b>1</b> | <b>151</b> |
| Additional NUTS3 sampled but without any species detected | 1                 |           | 2          |          | 3          |

\* VectorNet priority species
